# Supplementary material for: Reversible nickel-metallacycle formation with a phosphinimine-based pincer ligand
Source: Royal Society of Chemistry journal article supplement (doi:10.1039/d0dt01118e), 2020-01-01
Supplement: d0dt01118e1.pdf [file d0dt01118e1.pdf]

Supporting Information

for

## **Reversible Nickel-Metallacycle Formation with a Phosphinimine-based Pincer Ligand**

Xiujing Xing, Shaoguang Zhang, Laura M. Thierer, Michael R. Gau, Patrick J. Carroll, Neil Tomson\*

P. Roy and Diana T. Vagelos Laboratories, Department of Chemistry, University of Pennsylvania, Philadelphia, PA, 19104, United States

### **Contents**

|                                                      |           |
|------------------------------------------------------|-----------|
| <b>1. NMR Spectra .....</b>                          | <b>2</b>  |
| <b>2. Kinetic Study of Isocyanide Insertion.....</b> | <b>25</b> |
| <b>3. Crystallographic data .....</b>                | <b>32</b> |

## 1. NMR Spectra

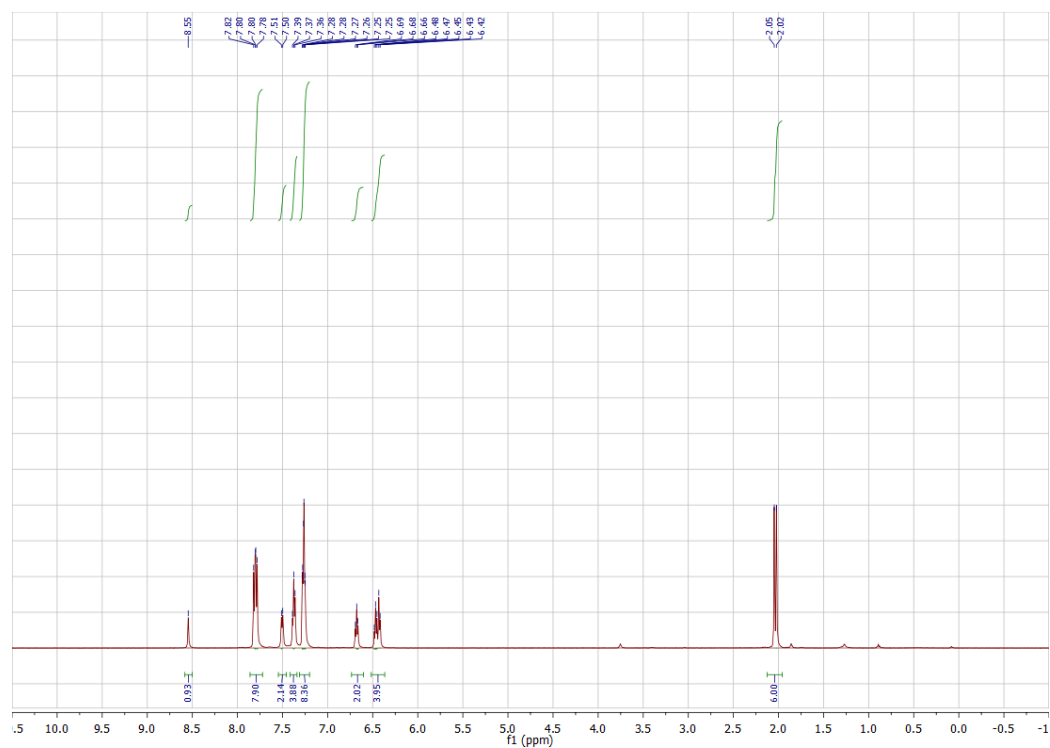

Figure S1.  $^1\text{H}$  NMR spectrum of **1** in  $\text{CDCl}_3$ .

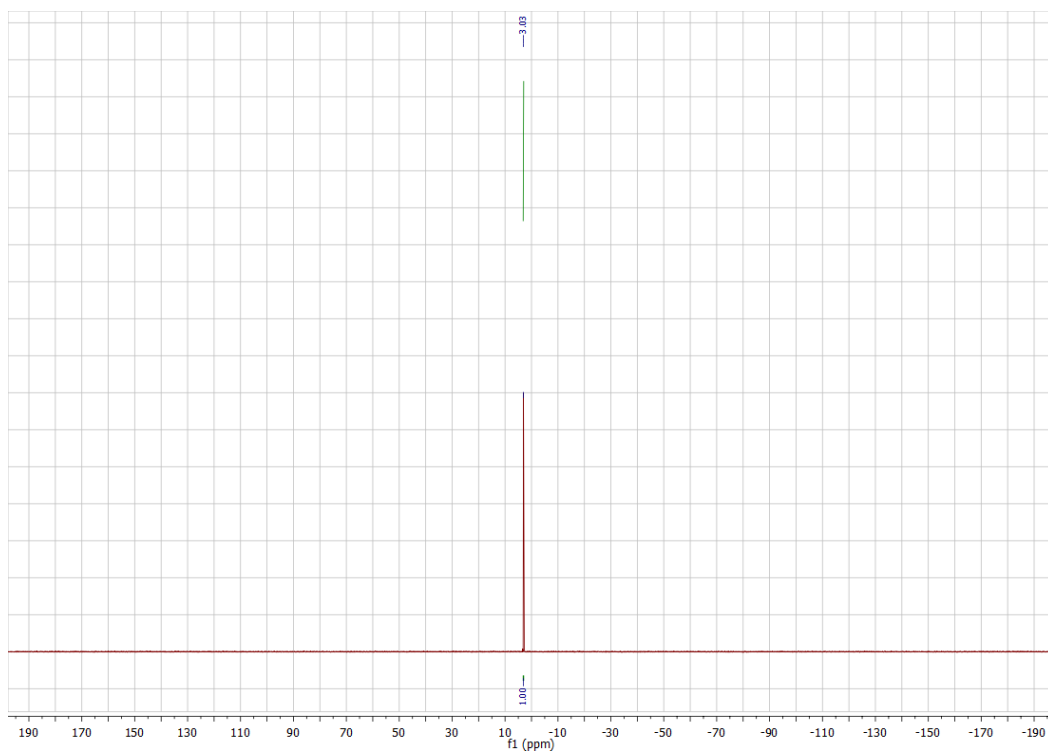

Figure S2.  $^{31}\text{P}\{^1\text{H}\}$  NMR spectrum of **1** in  $\text{CDCl}_3$ .

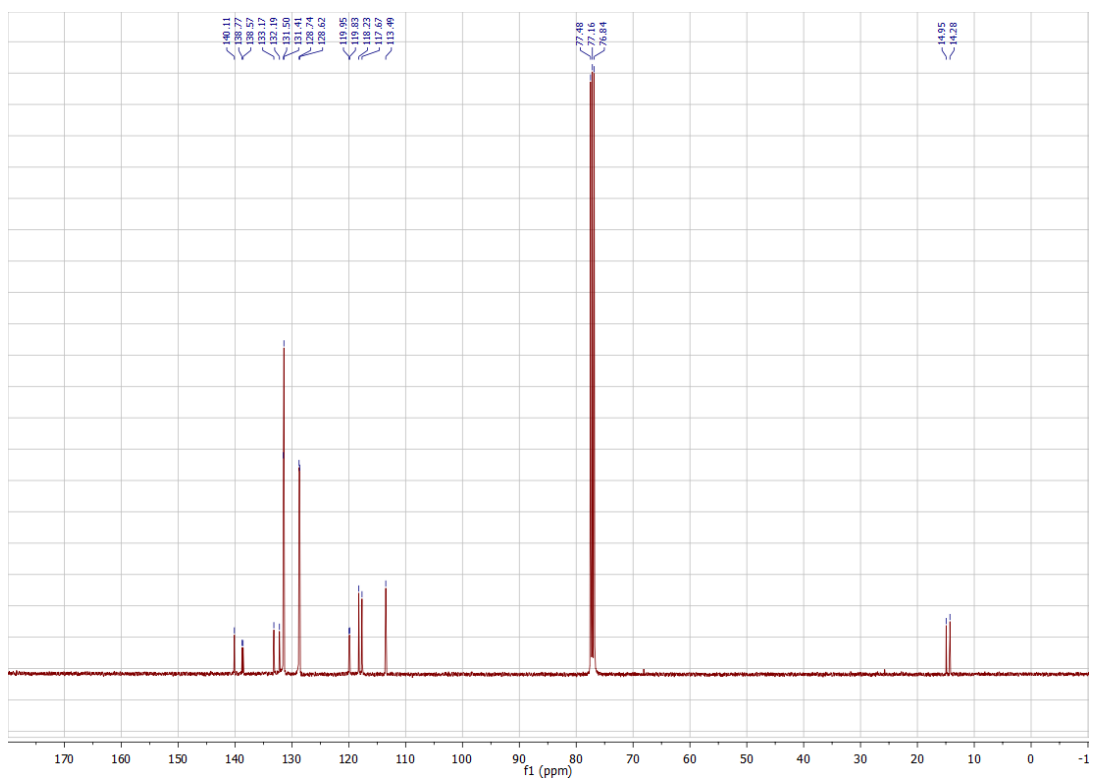

**Figure S3.**  $^{13}\text{C}\{^1\text{H}\}$  NMR spectrum of **1** in  $\text{CDCl}_3$ .

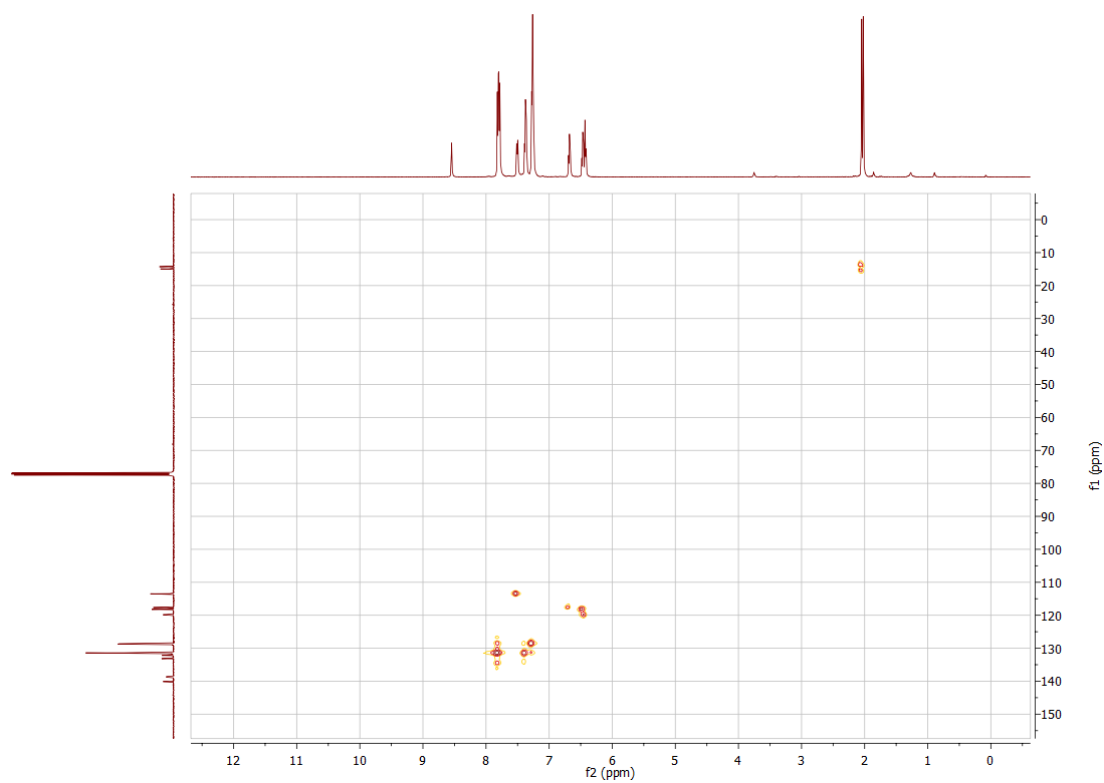

**Figure S4.**  $^1\text{H}-^{13}\text{C}$  HSQC 2D NMR spectrum of **1** in  $\text{CDCl}_3$ .

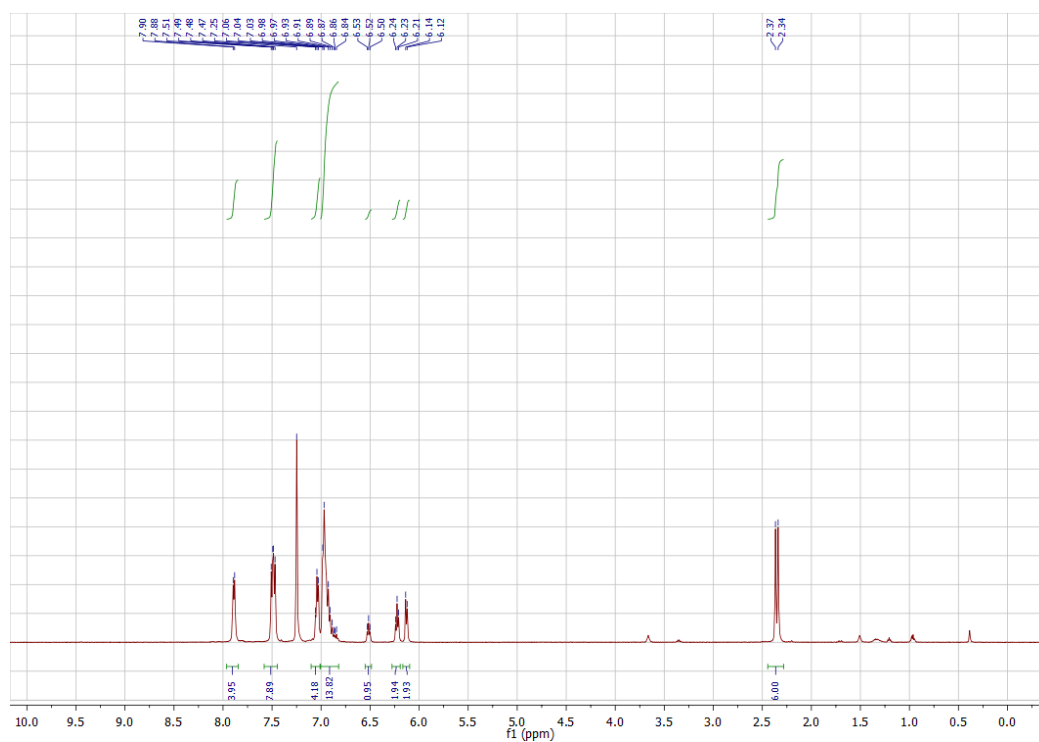

**Figure S5.** <sup>1</sup>H NMR spectrum of **2** in C<sub>6</sub>D<sub>6</sub>.

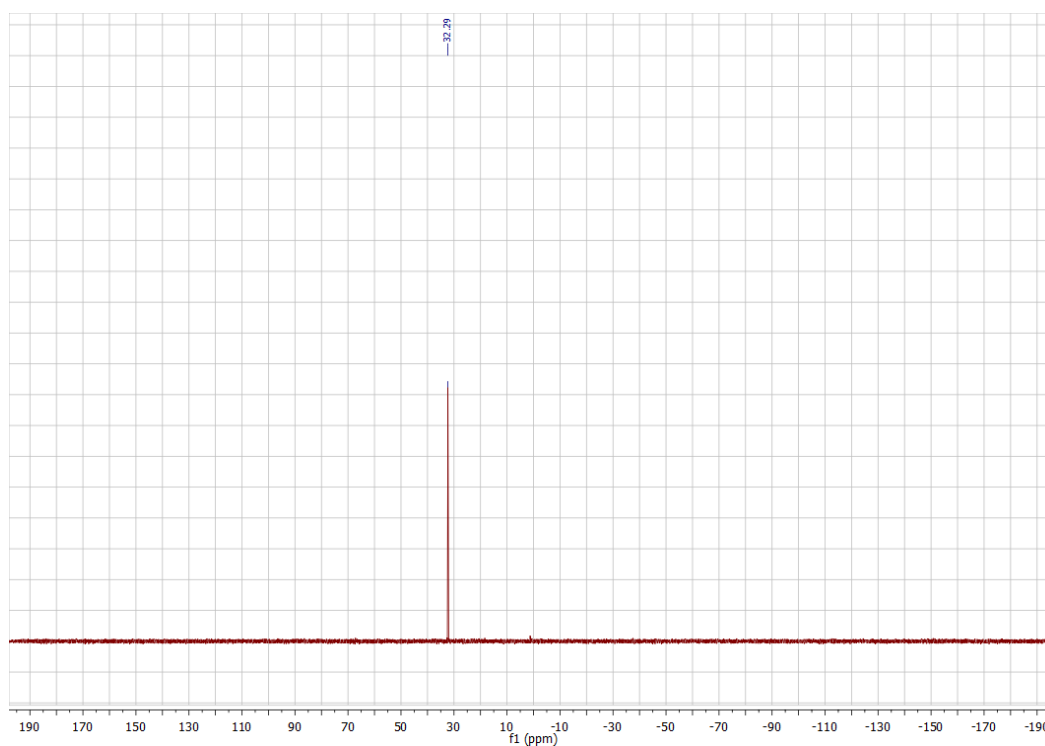

**Figure S6.** <sup>31</sup>P{<sup>1</sup>H} NMR spectrum of **2** in C<sub>6</sub>D<sub>6</sub>.

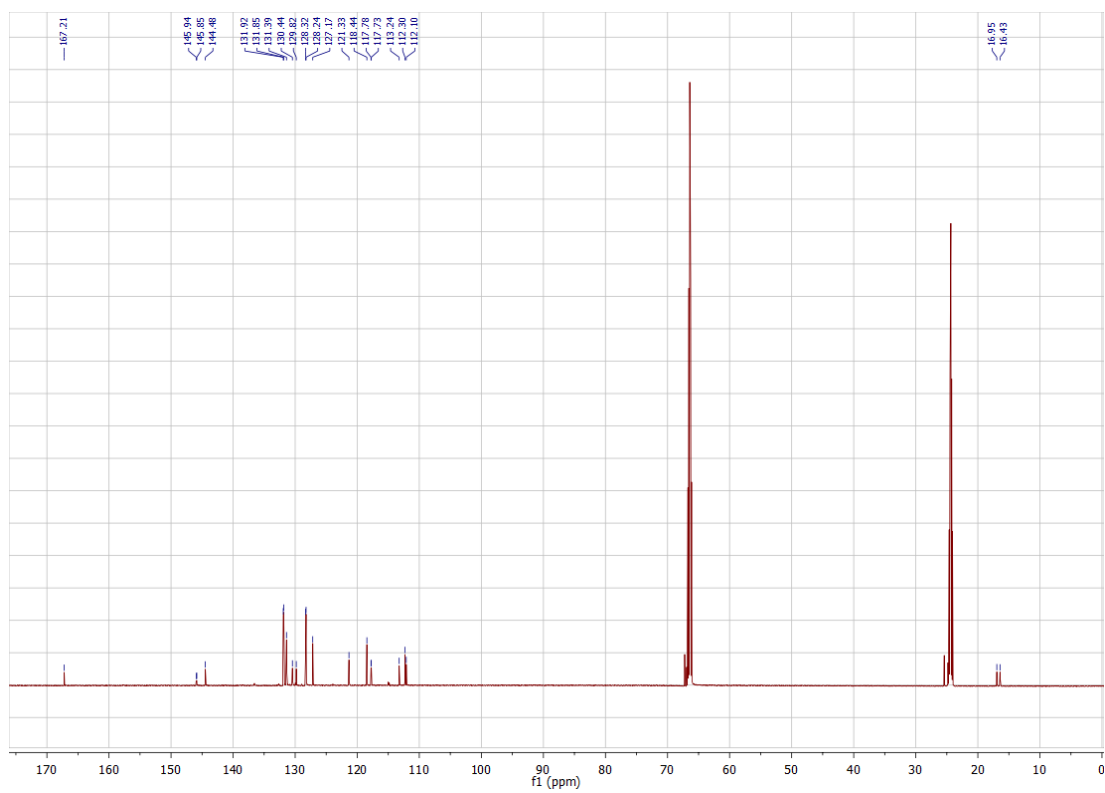

**Figure S7.**  $^{13}\text{C}\{^1\text{H}\}$  NMR spectrum of **2** in  $\text{THF-}d_8$ .

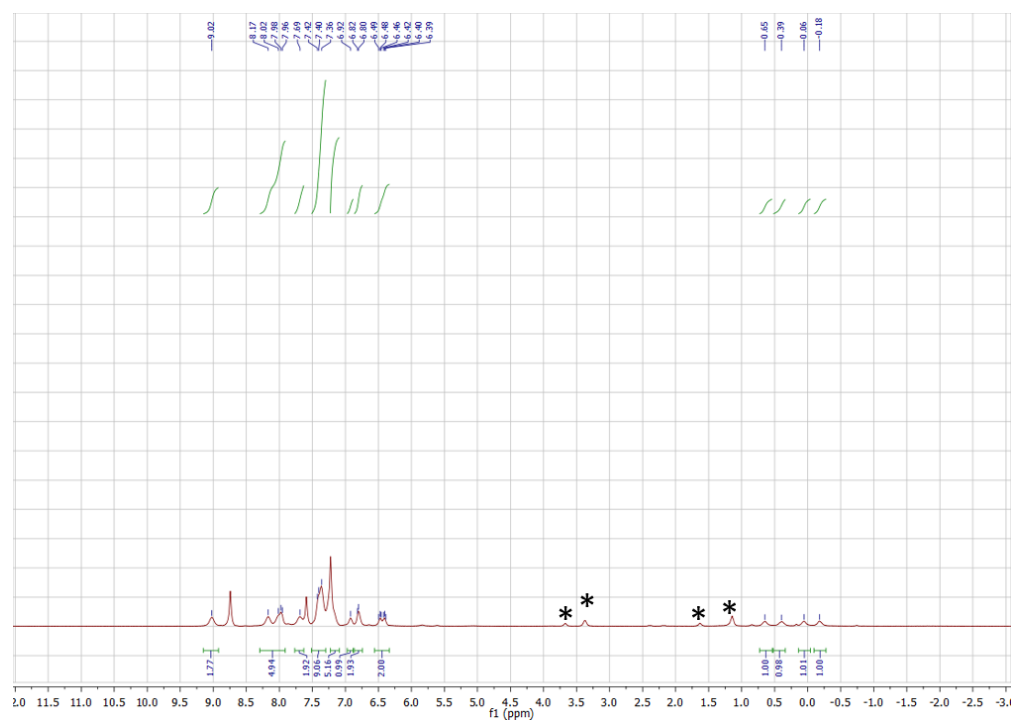

**Figure S8.**  $^1\text{H}$  NMR spectrum of **3** in  $\text{Pyr-}d_5$ . \* = THF and  $\text{Et}_2\text{O}$ .

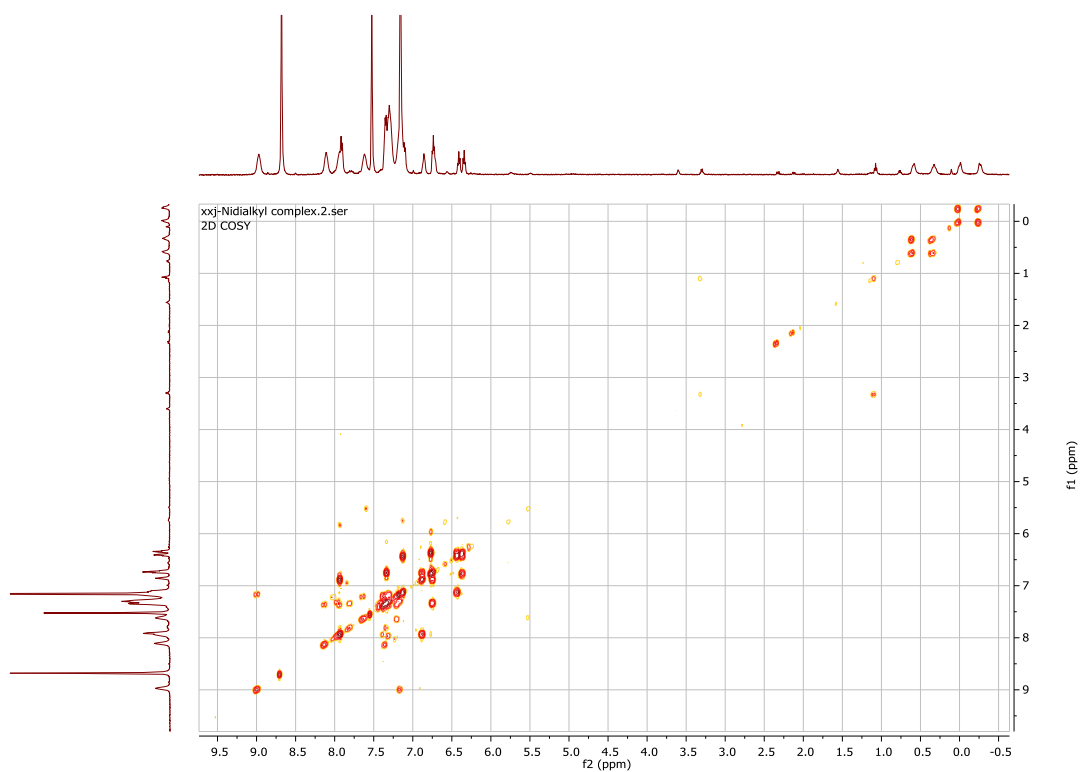

**Figure S9.**  $^1\text{H}$ - $^1\text{H}$  COSY 2D NMR spectrum of **3** in  $\text{Pyr-}d_5$ .

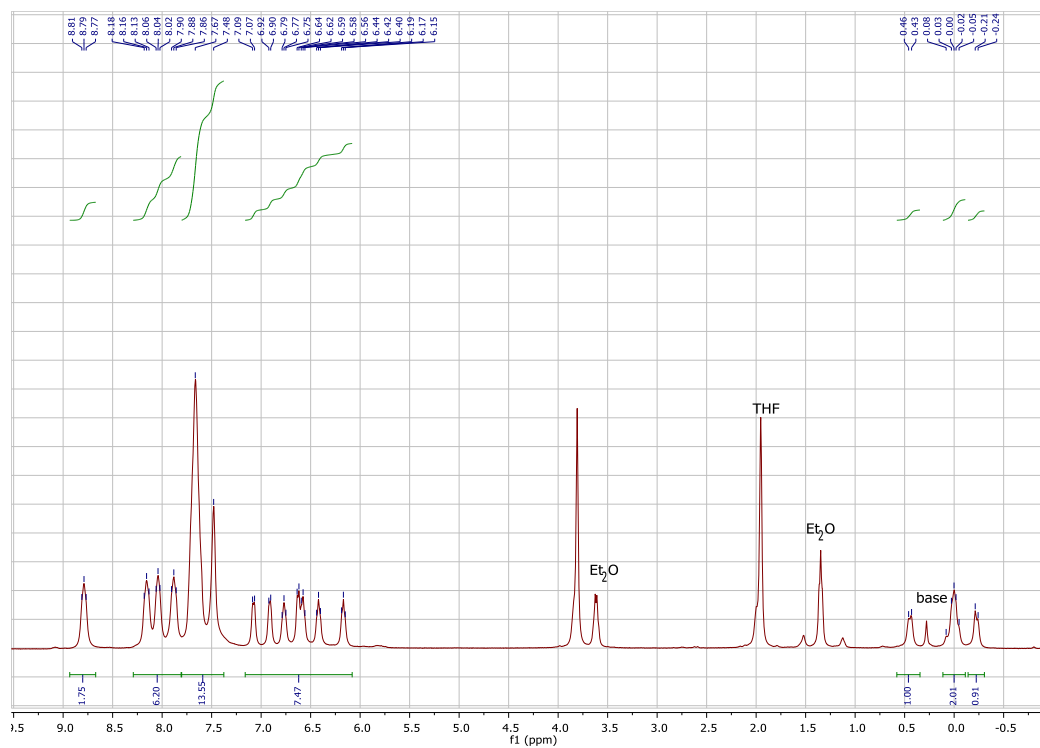

**Figure S10.**  $^1\text{H}$  NMR spectrum of **3** in  $\text{THF-}d_8$ . Note: Base is NaHMDS.

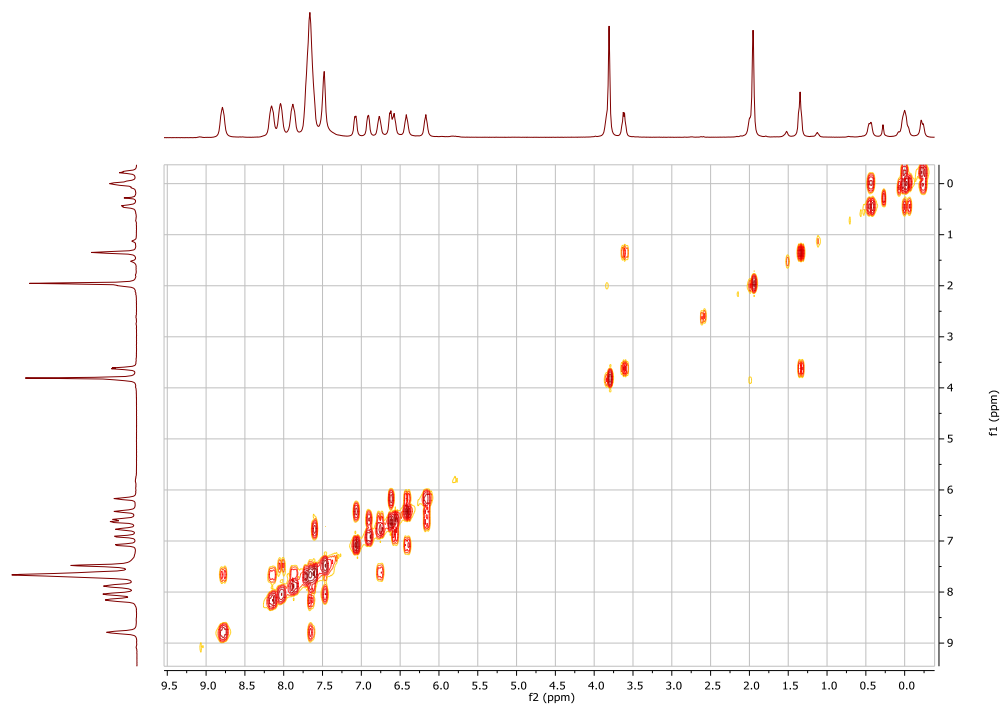

**Figure S11.**  $^1\text{H}$ - $^1\text{H}$  COSY 2D NMR spectrum of **3** in  $\text{THF-}d_8$ .

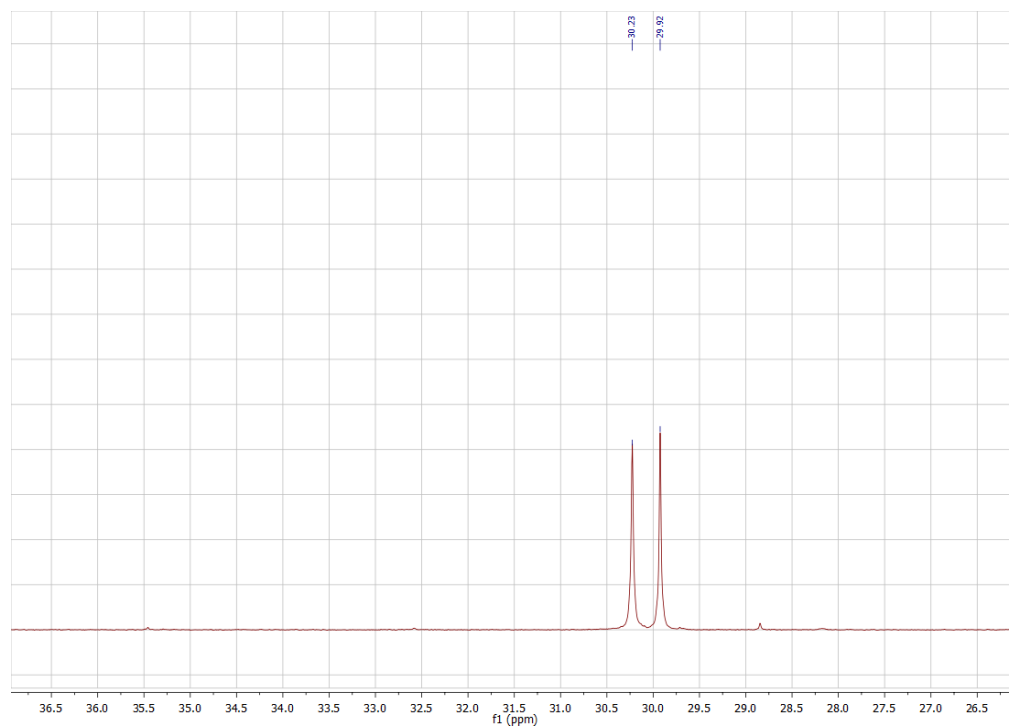

**Figure S12.**  $^{31}\text{P}\{^1\text{H}\}$  NMR spectrum of **3** in  $\text{THF-}d_8$ .

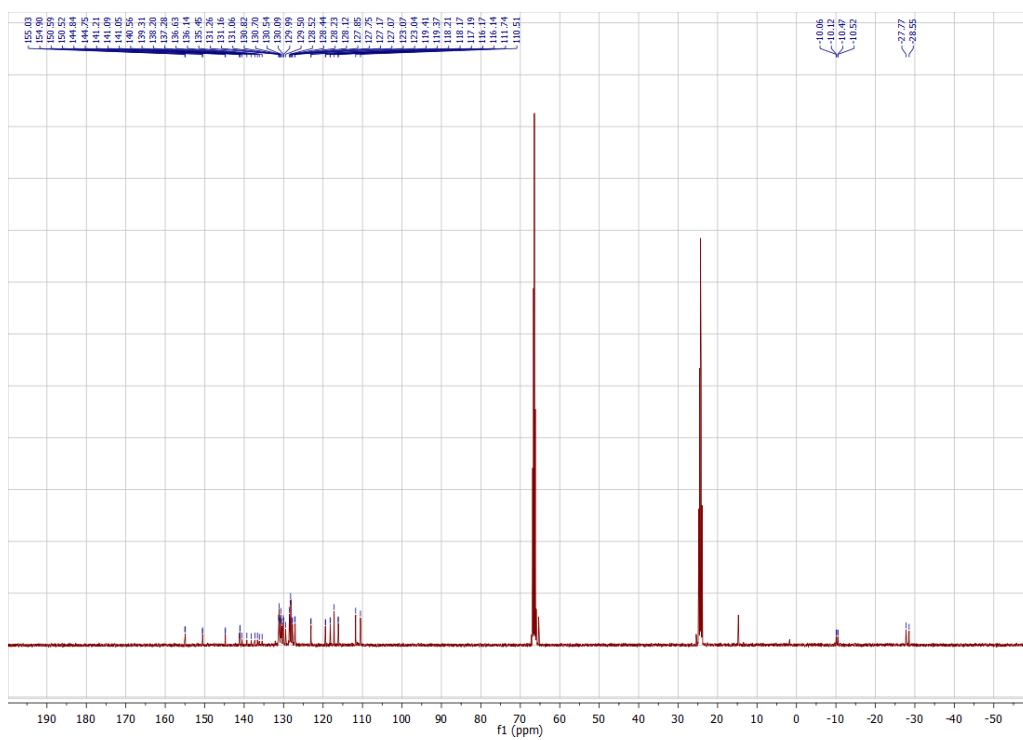

**Figure S13a.**  $^{13}\text{C}\{^1\text{H}\}$  NMR spectrum of **3** in  $\text{THF-}d_8$ .

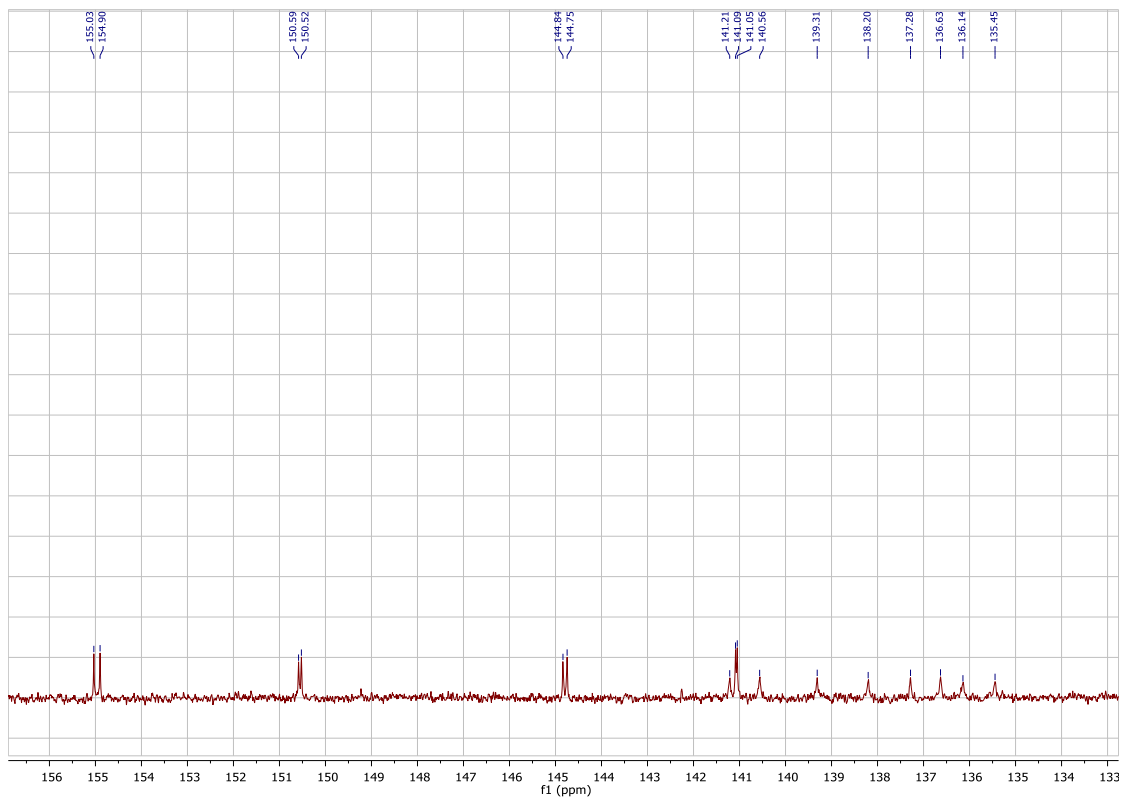

**Figure S13b.**  $^{13}\text{C}\{^1\text{H}\}$  NMR spectrum of **3** in  $\text{THF-}d_8$  from 156 to 135 ppm, see Figure S13a for the full spectrum.

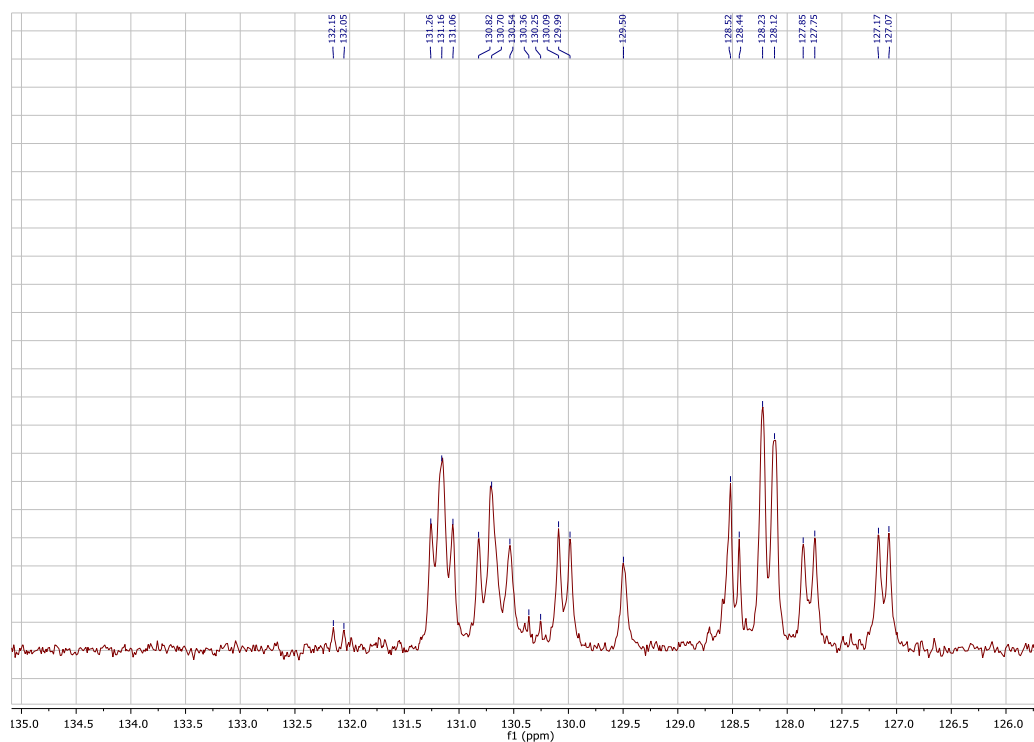

**Figure S13c.**  $^{13}\text{C}\{^1\text{H}\}$  NMR spectrum of **3** in  $\text{THF-}d_8$  from 135 to 126 ppm, see Figure S13a for the full spectrum.

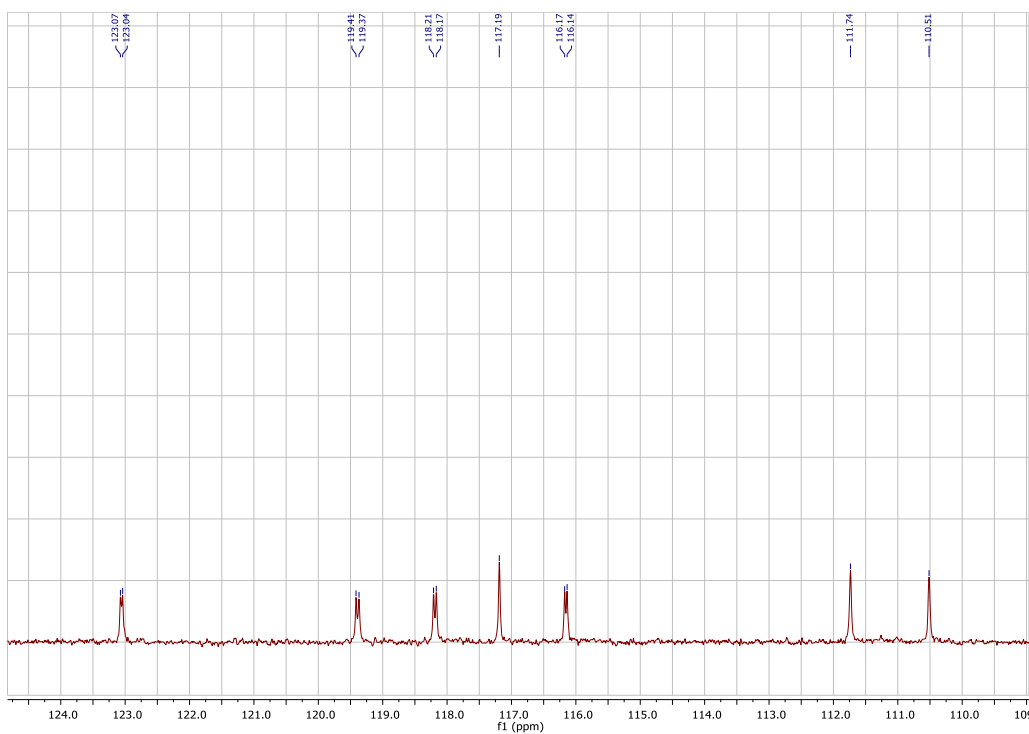

**Figure S13d.**  $^{13}\text{C}\{^1\text{H}\}$  NMR spectrum of **3** in  $\text{THF-}d_8$  from 125 to 110 ppm, see Figure S13a for the full spectrum.

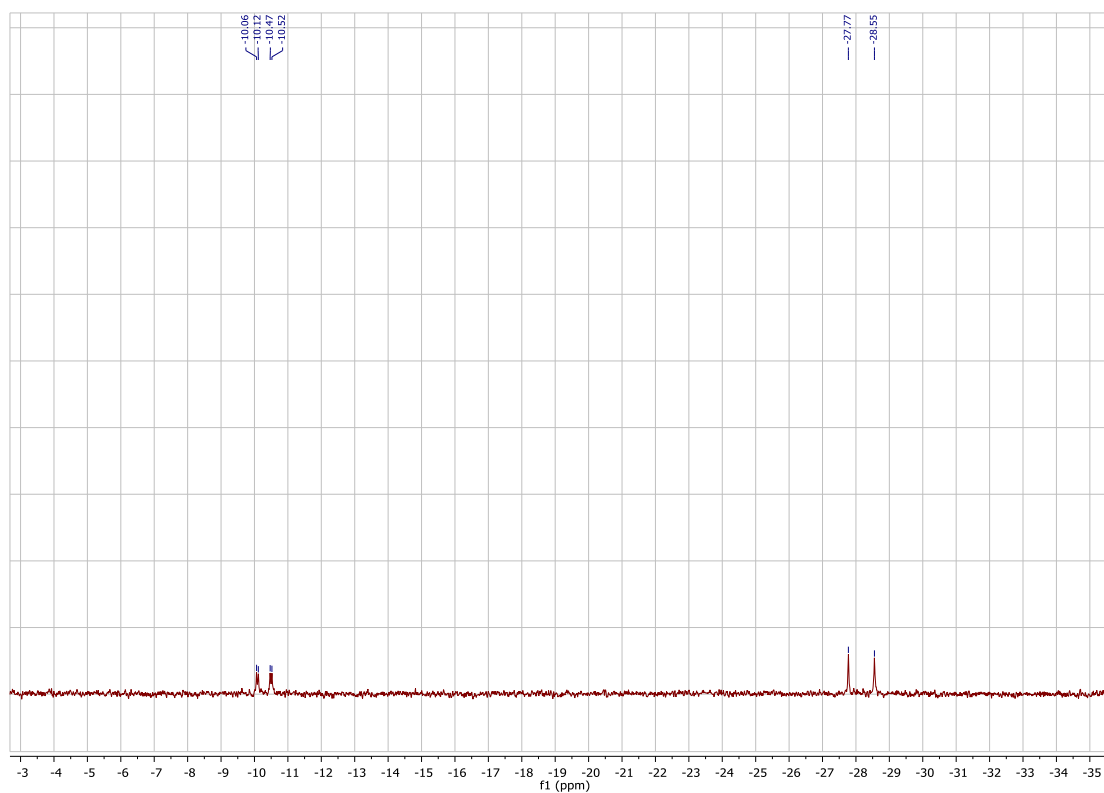

**Figure S13e.**  $^{13}\text{C}\{^1\text{H}\}$  NMR spectrum of **3** in  $\text{THF-}d_8$  from -3 to -35 ppm, see Figure S13a for the full spectrum.

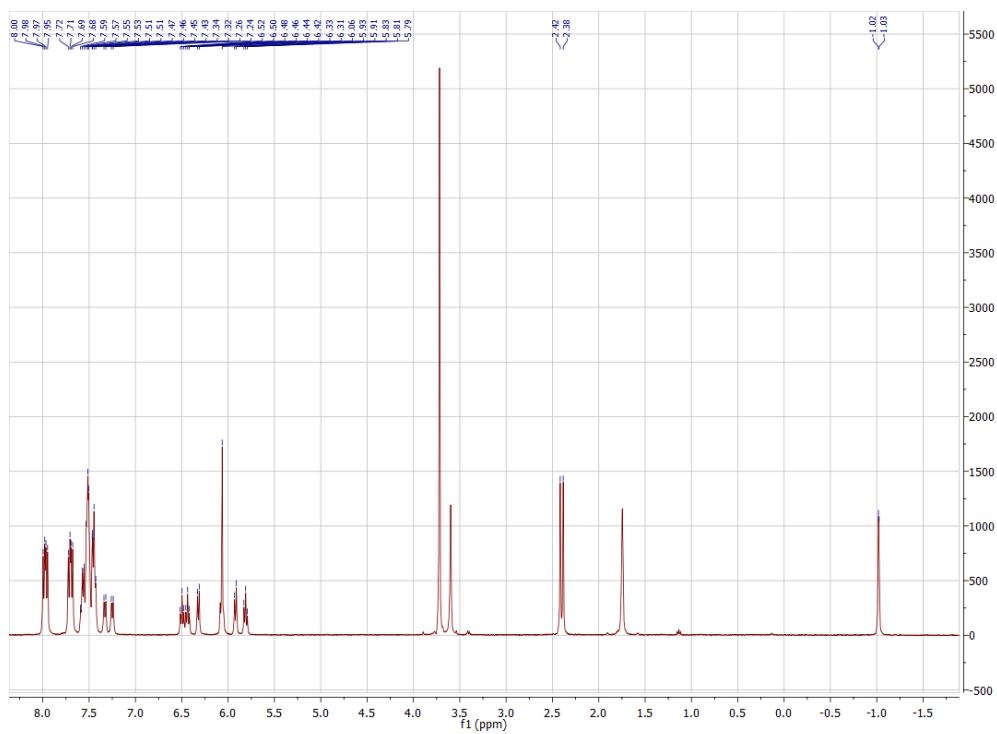

**Figure S14.**  $^1\text{H}$  NMR spectrum of **4** in  $\text{THF-}d_8$ .

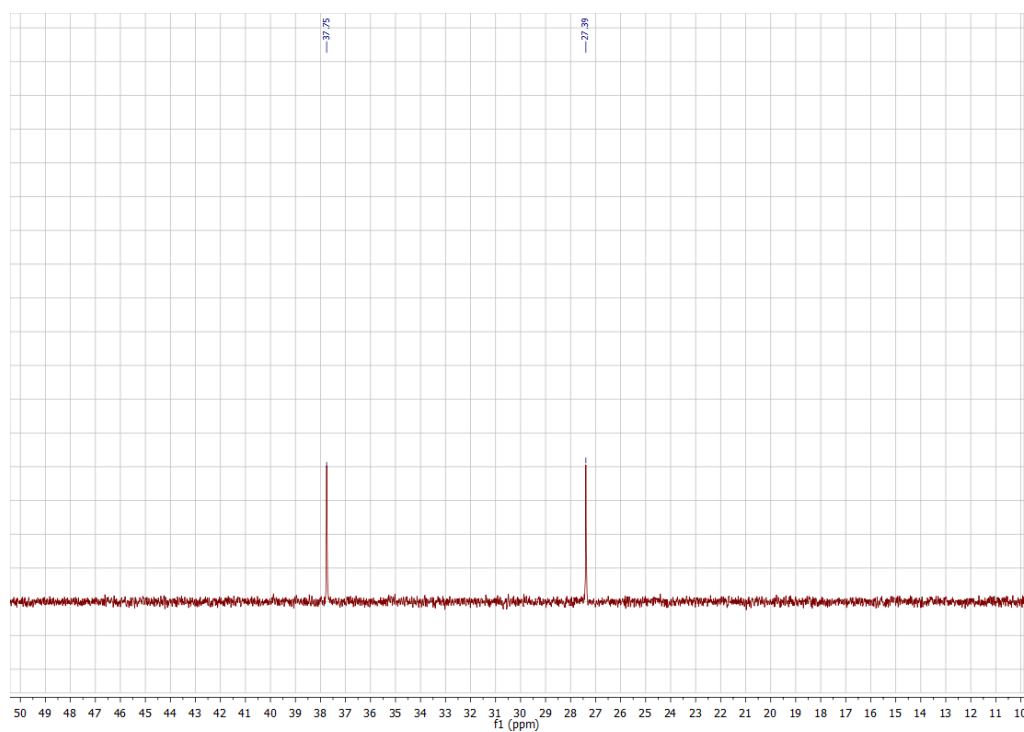

Figure S15.  $^{31}\text{P}\{^1\text{H}\}$  NMR spectrum of **4** in  $\text{C}_6\text{D}_6$ .

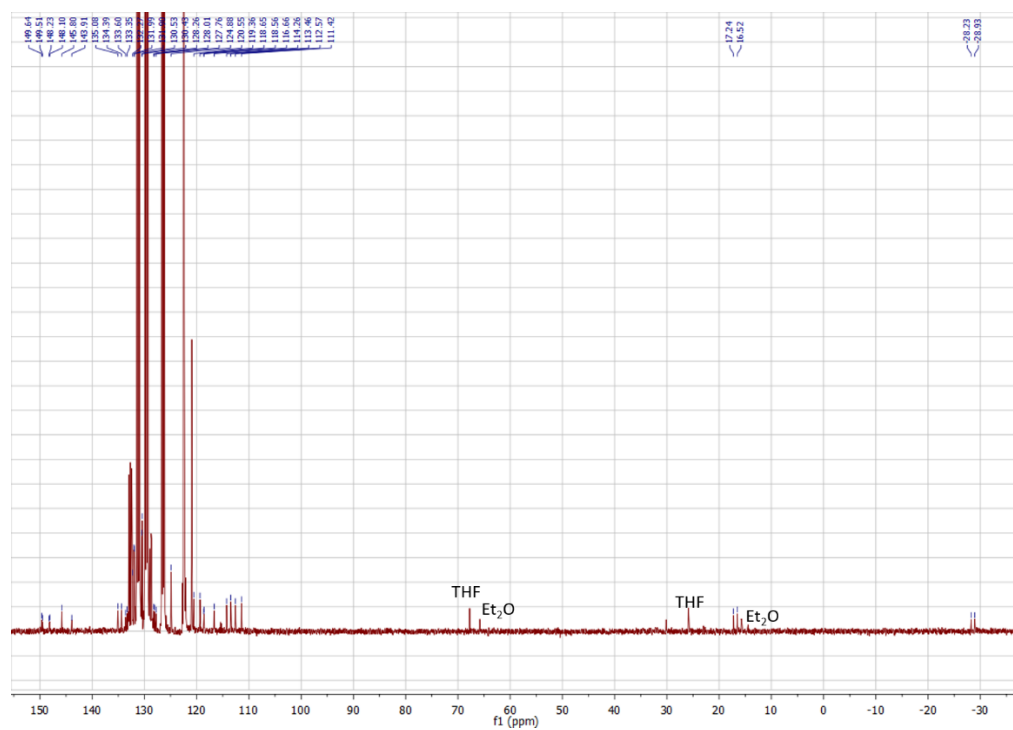

Figure S16a.  $^{13}\text{C}\{^1\text{H}\}$  NMR spectrum of **4** in  $\text{C}_6\text{D}_5\text{Br}$ .

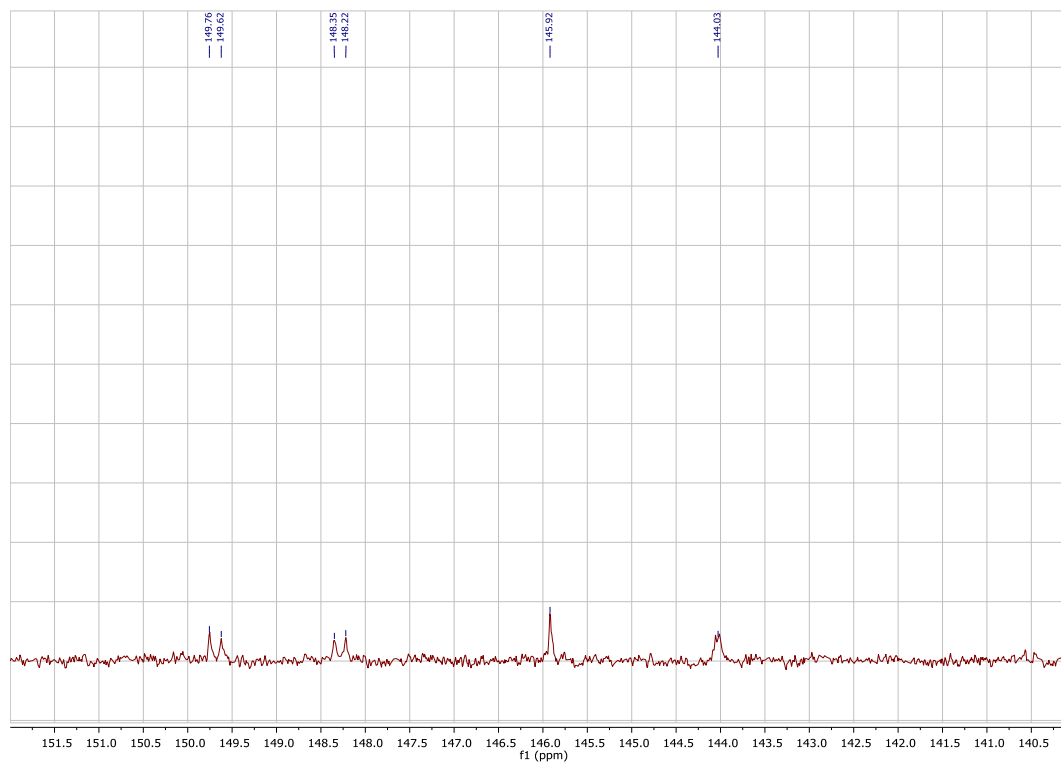

**Figure S16b.**  $^{13}\text{C}\{^1\text{H}\}$  NMR spectrum of **4** in  $\text{C}_6\text{D}_5\text{Br}$  from 152 to 140 ppm, see Figure S16a for the full spectrum.

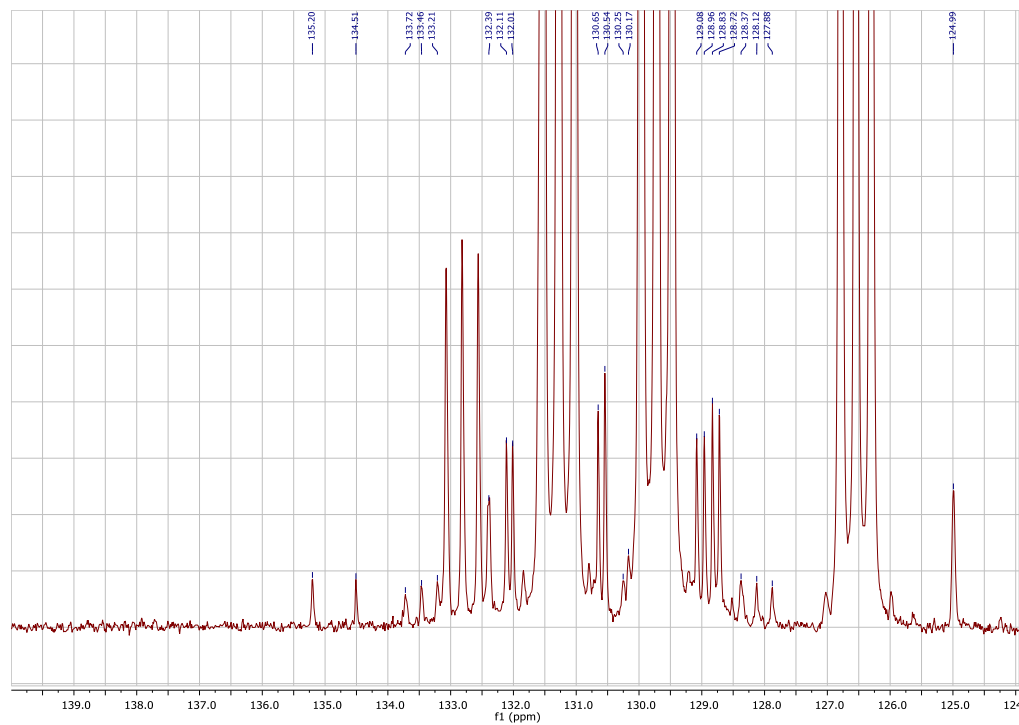

**Figure S16c.**  $^{13}\text{C}\{^1\text{H}\}$  NMR spectrum of **4** in  $\text{C}_6\text{D}_5\text{Br}$  from 140 to 124 ppm, see Figure S16a for the full spectrum. Note: 133.09 – 133.06 ppm and 127.76 – 128.26 ppm are solvent residues.

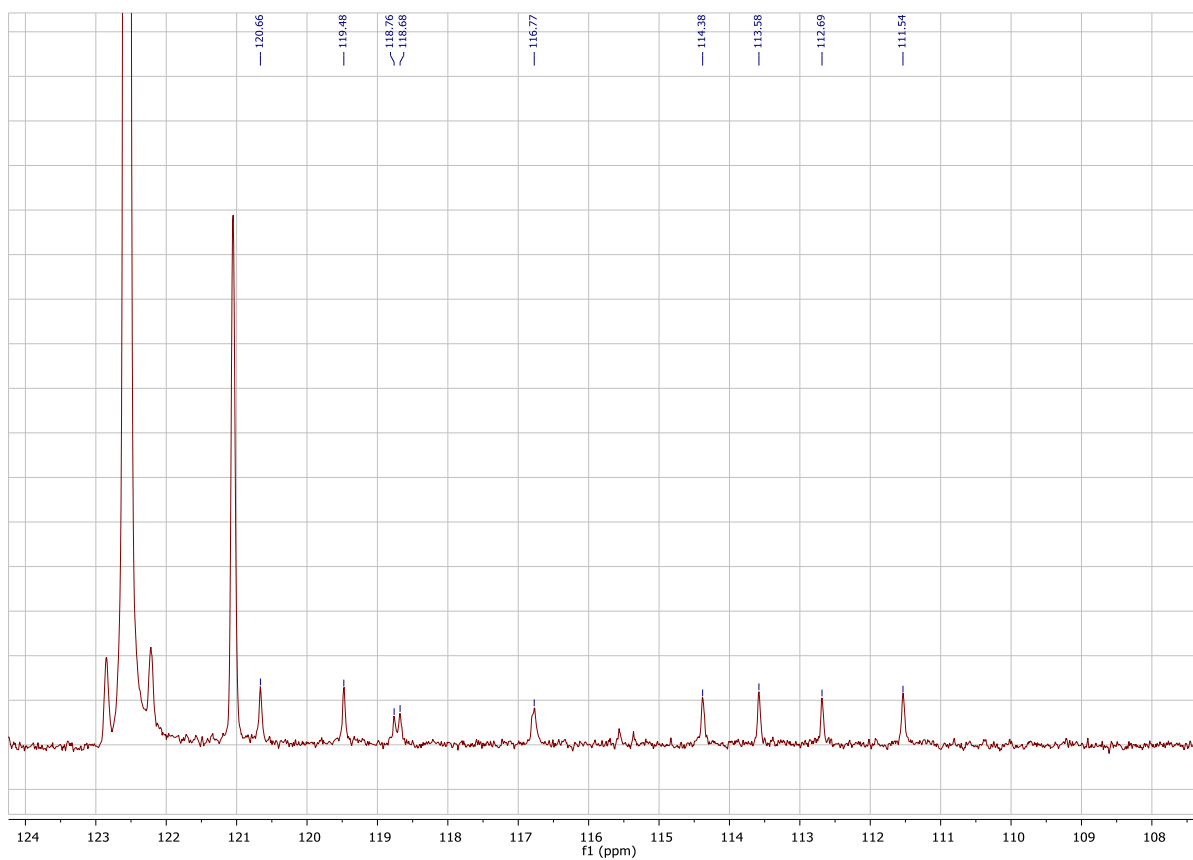

**Figure S16d.**  $^{13}\text{C}\{^1\text{H}\}$  NMR spectrum of **4** in  $\text{C}_6\text{D}_5\text{Br}$  from 124 to 106 ppm, see Figure S16a for the full spectrum.

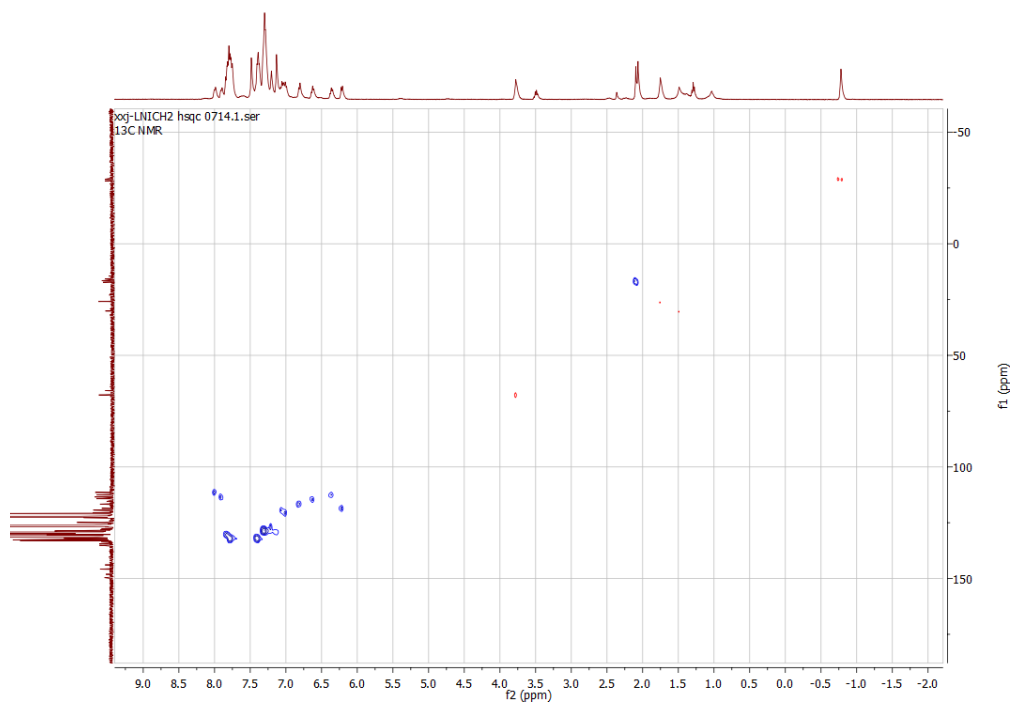

**Figure S17.**  $^1\text{H}-^{13}\text{C}$  HSQC 2D NMR spectrum of **4** in  $\text{C}_6\text{D}_5\text{Br}$ .

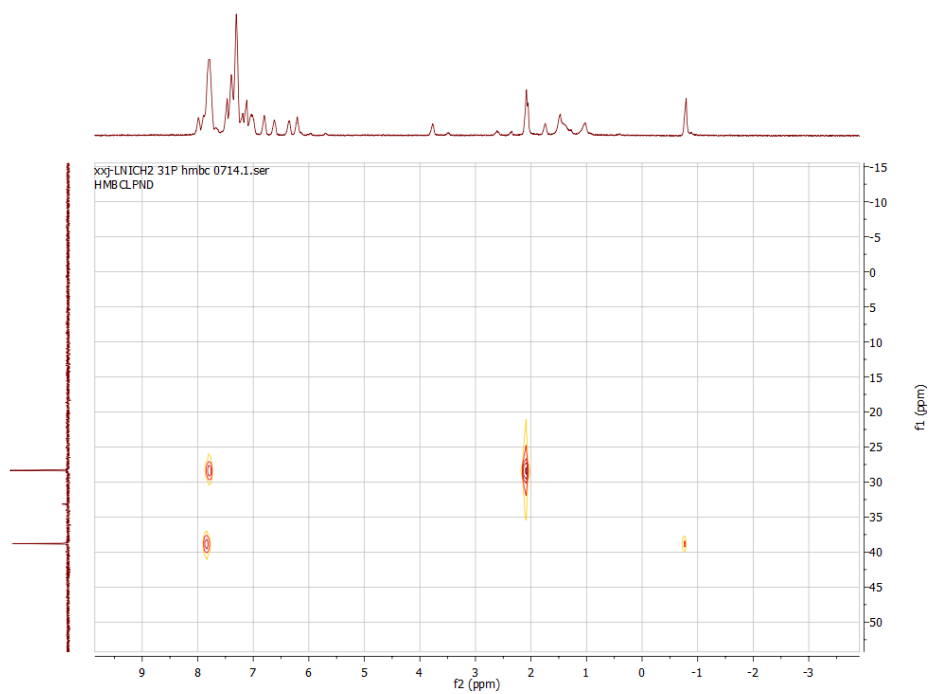

**Figure S18.**  $^1\text{H}$ - $^{31}\text{P}$  HMBC 2D NMR spectrum of **4** in  $\text{C}_6\text{D}_5\text{Br}$ .

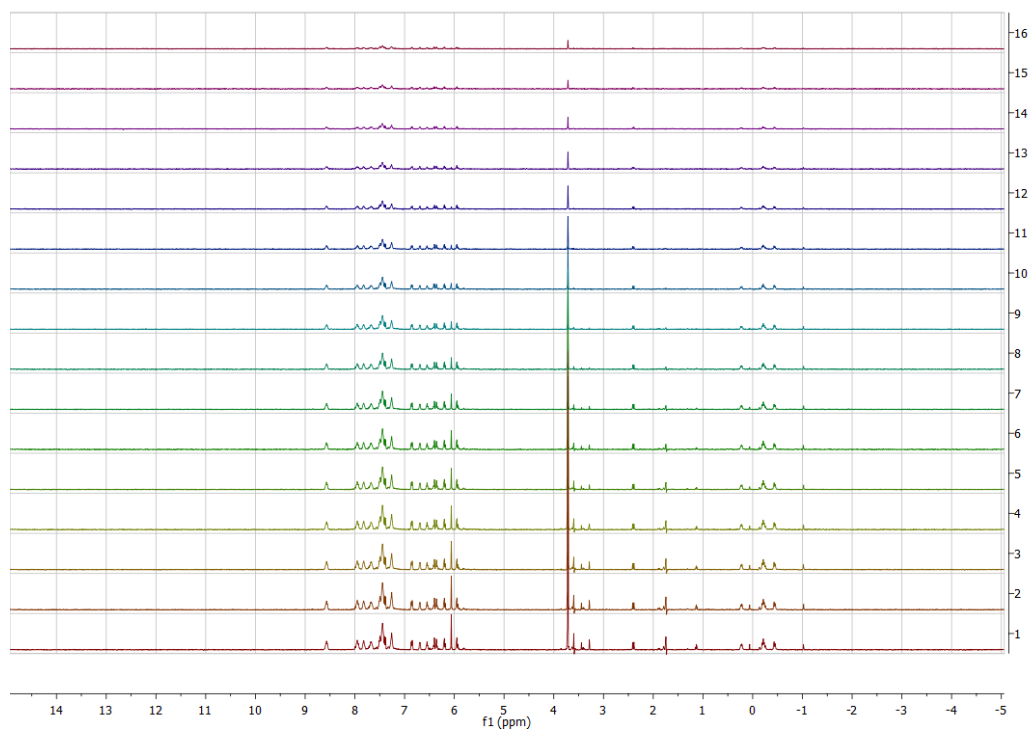

**Figure S19.**  $^1\text{H}$  NMR DOSY spectra of **3** in pyridine- $d_5$  with different gradients (from 2% to 95%).

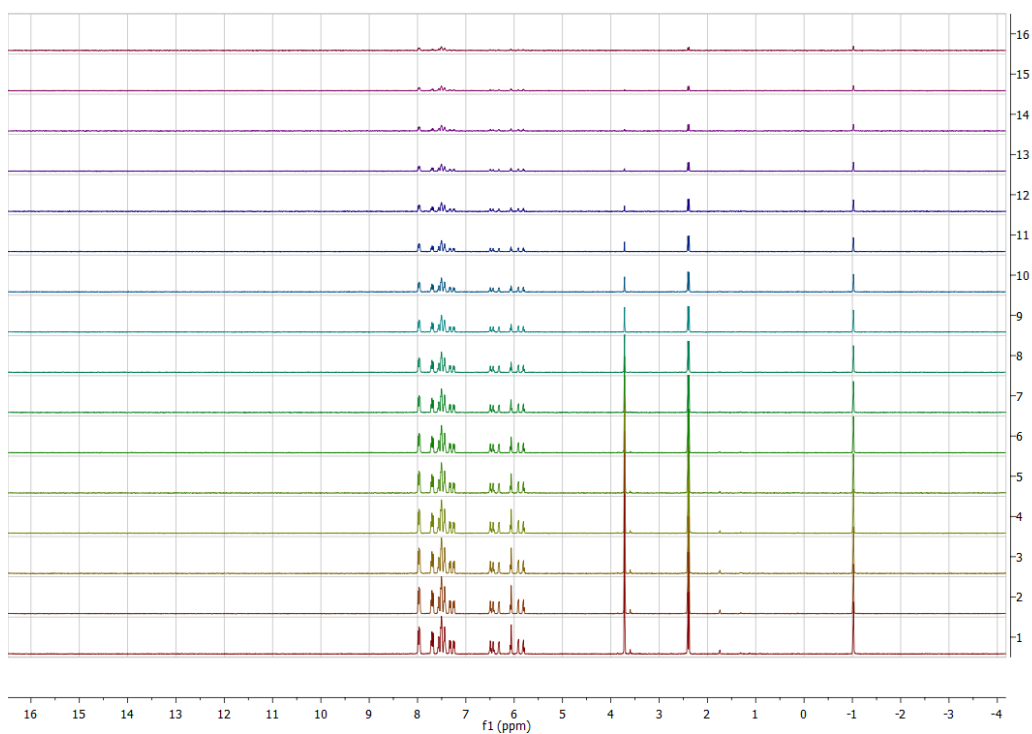

**Figure S20.**  $^1\text{H}$  NMR DOSY spectra of **4** in pyridine- $d_5$  with different gradients (from 2% to 95%).

**Table S21.** Diffusion constants obtained from DOSY experiments.

| Compound          | Diff Constant ( $\text{m}^2/\text{s}$ ) |
|-------------------|-----------------------------------------|
| trimethoxybenzene | 1.635e-009                              |
| <b>3</b>          | 7.195e-010                              |
| <b>4</b>          | 6.968e-010                              |

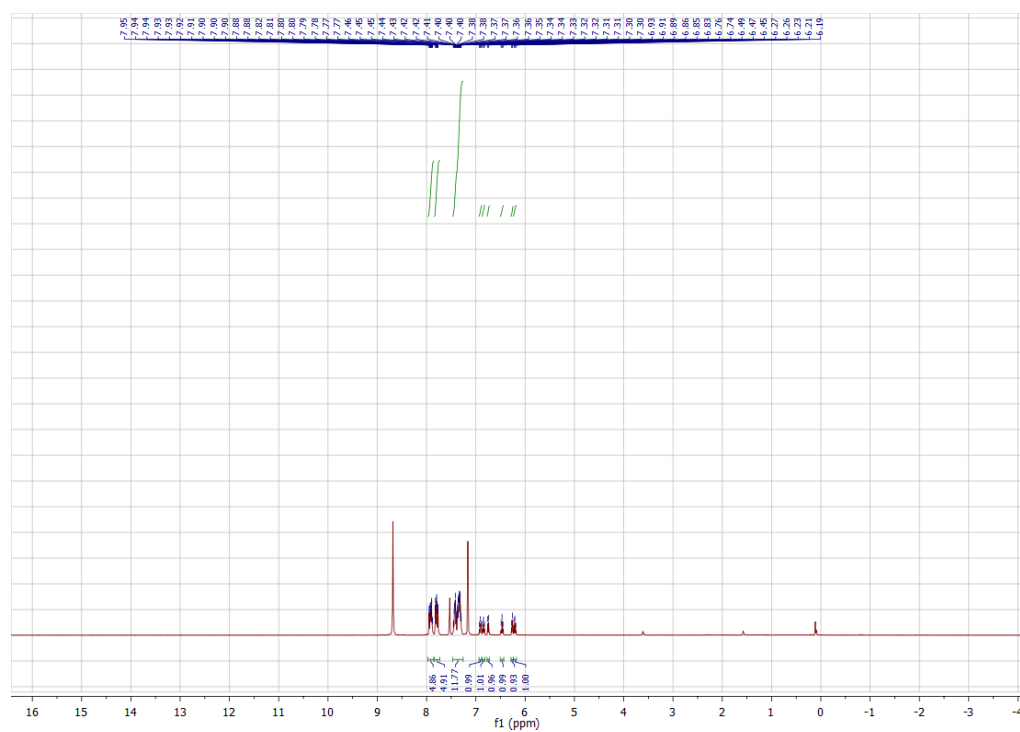

Figure S22. <sup>1</sup>H NMR spectrum of 4-*d*<sub>5</sub> in pyridine-*d*<sub>5</sub>.

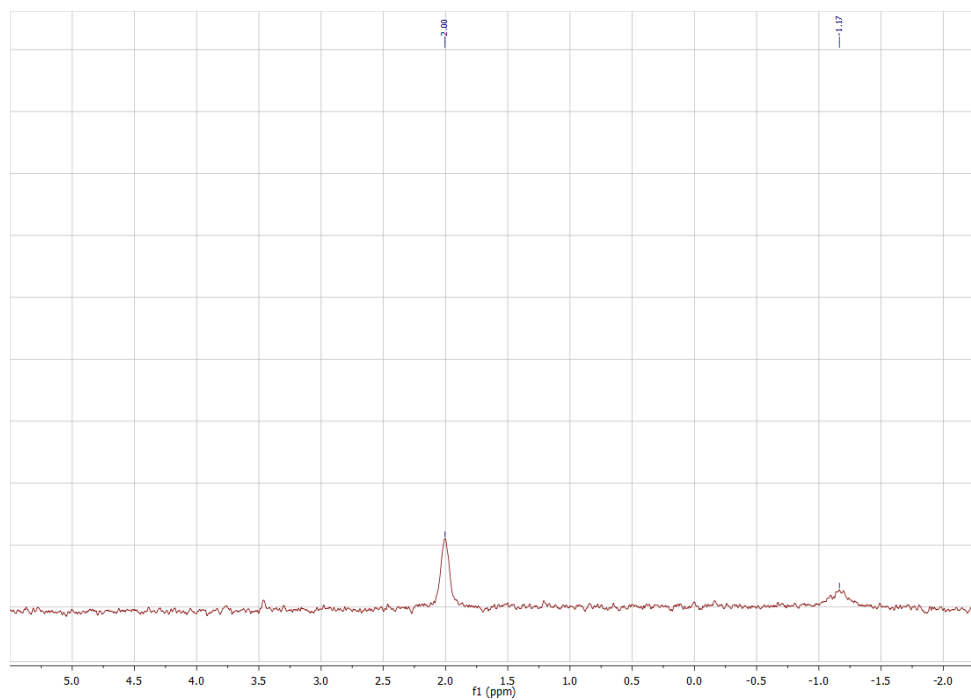

Figure S23. <sup>2</sup>H NMR spectrum of 4-*d*<sub>5</sub> in THF/C<sub>6</sub>D<sub>6</sub>.

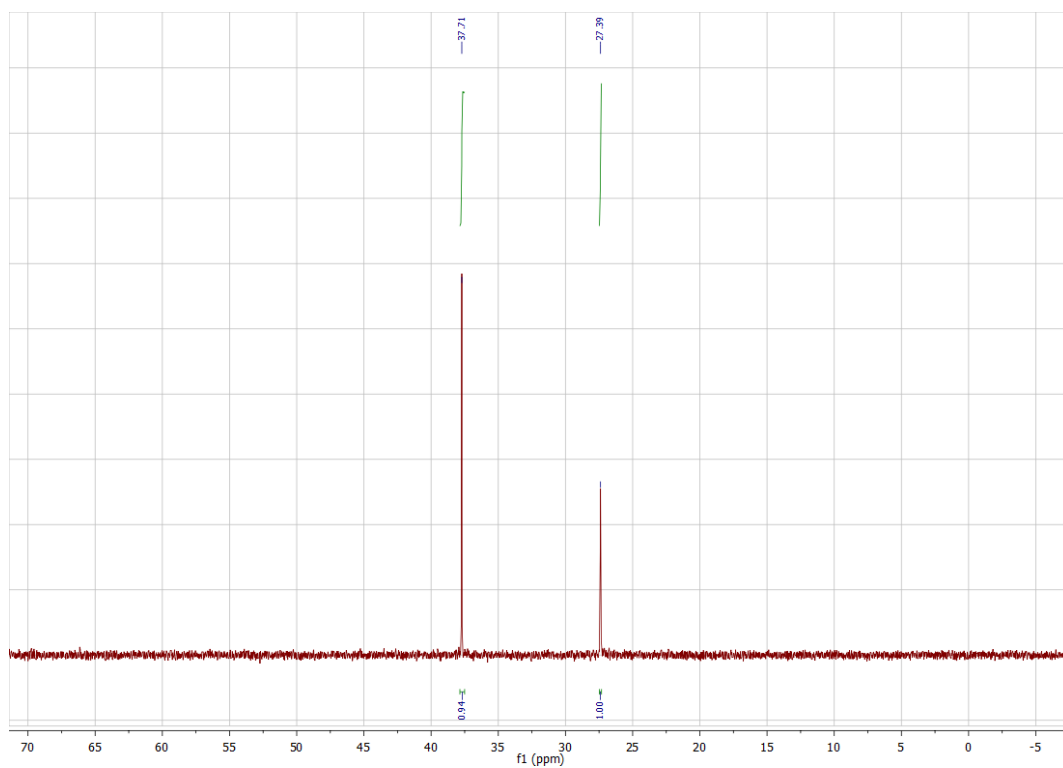

Figure S24.  $^{31}\text{P}\{^1\text{H}\}$  NMR spectrum of **4-d<sub>5</sub>** in pyridine-d<sub>5</sub>.

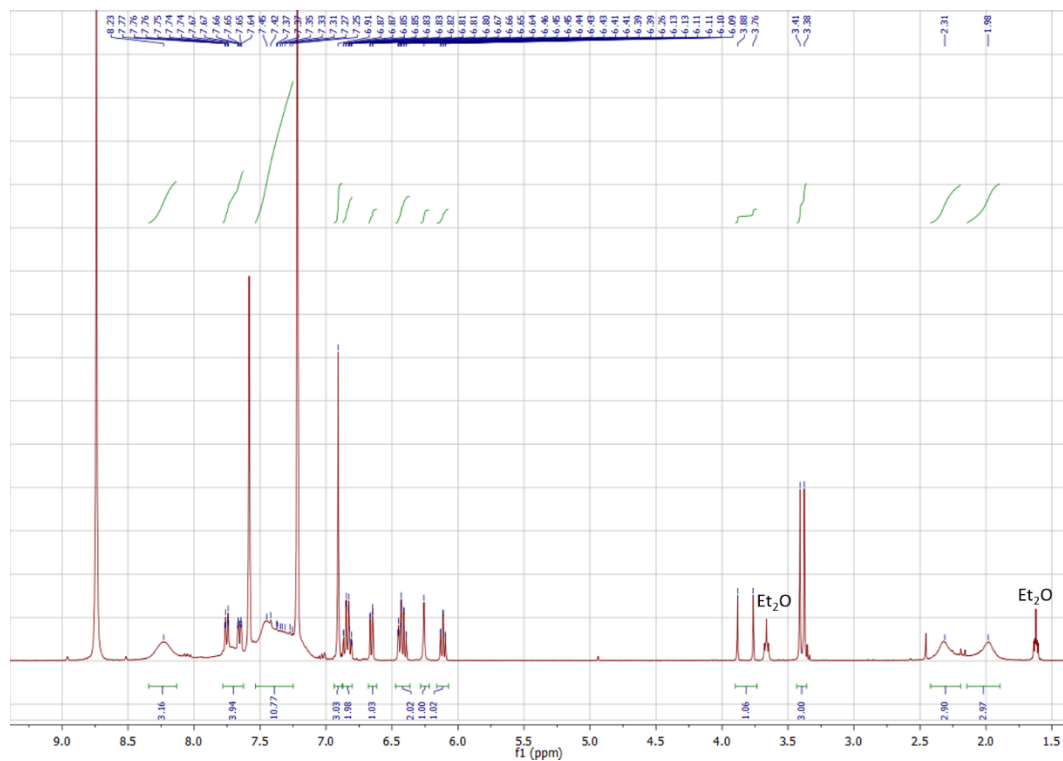

Figure S25.  $^1\text{H}$  NMR spectrum of **5** in pyridine-d<sub>5</sub>.

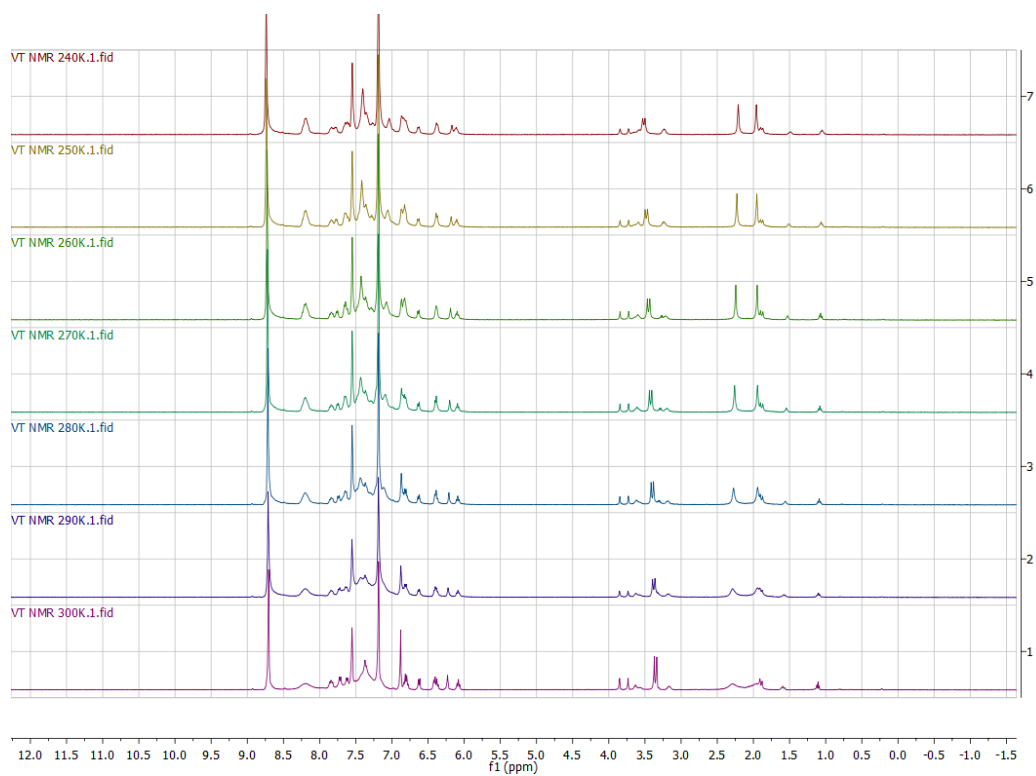

Figure S26. VT (300K to 240K)  $^1\text{H}$  NMR spectrum of **5** in pyridine- $d_5$ .

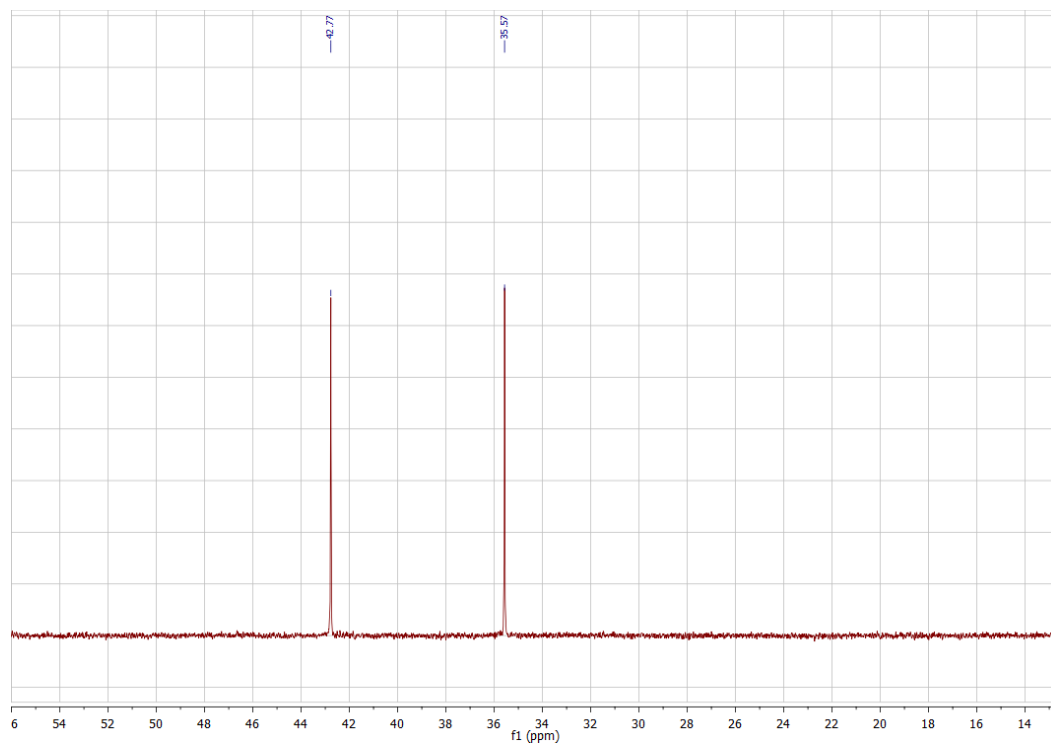

Figure S27.  $^{31}\text{P}\{^1\text{H}\}$  NMR spectrum of **5** in pyridine- $d_5$ .

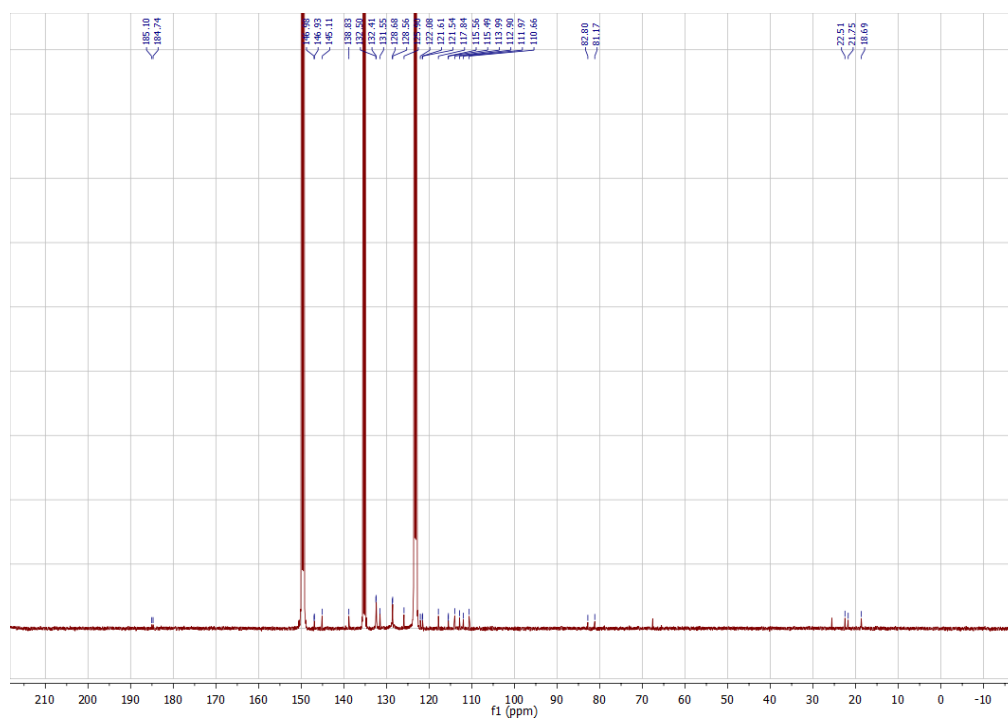

**Figure S28a.**  $^{13}\text{C}\{^1\text{H}\}$  NMR spectrum of **5** in  $\text{pyridine-}d_5$ .

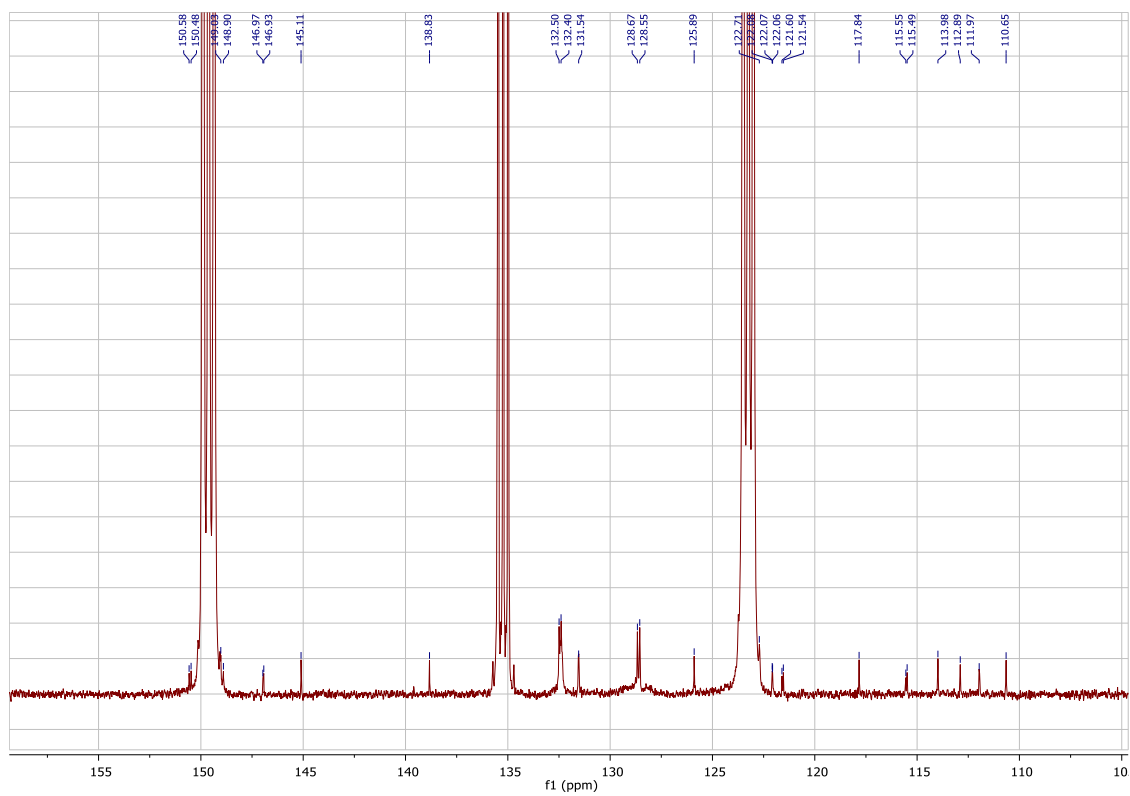

**Figure S28b.**  $^{13}\text{C}\{^1\text{H}\}$  NMR spectrum of **5** in  $\text{pyridine-}d_5$  from 160 to 105 ppm, see Figure S28a for the full spectrum.

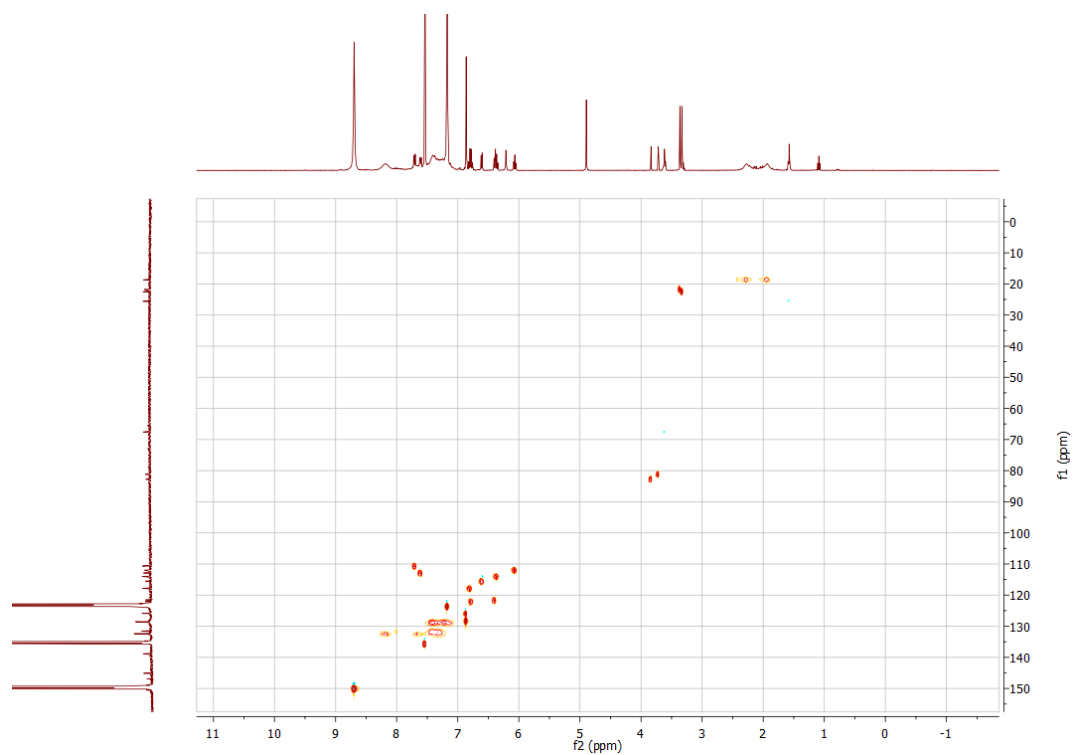

**Figure S29.**  $^1\text{H}$ - $^{13}\text{C}$  HSQC 2D NMR spectrum of **5** in pyridine- $d_5$ .

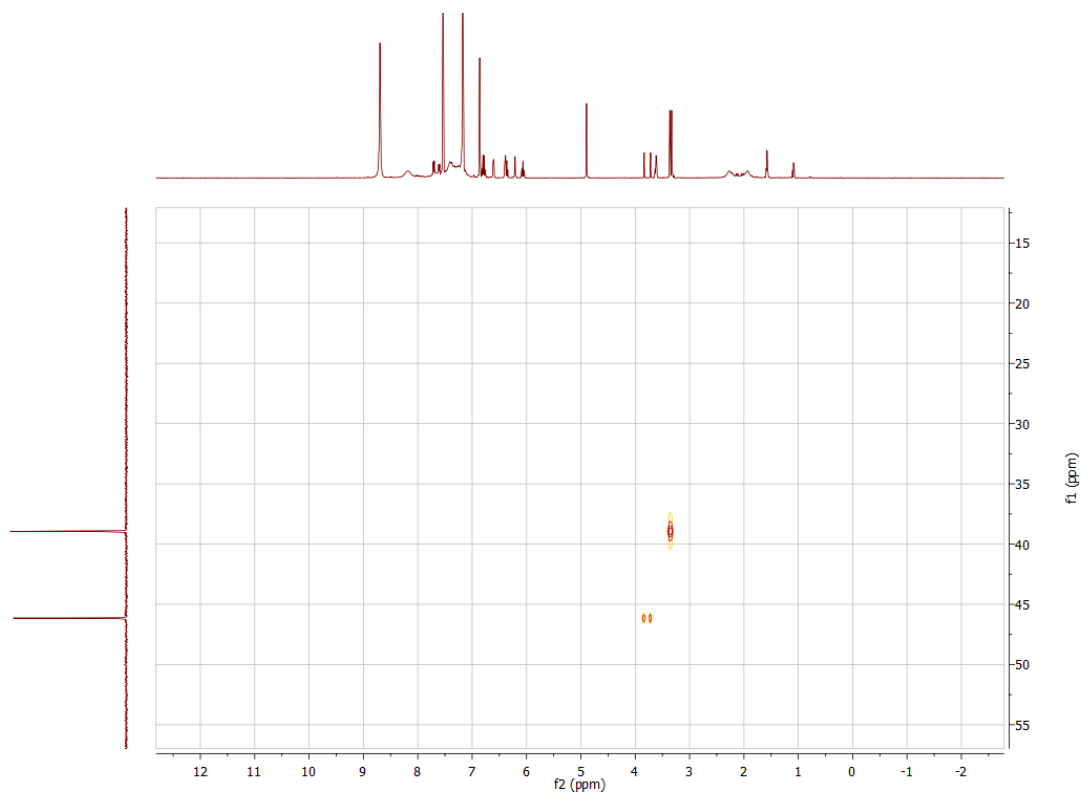

**Figure S30.**  $^1\text{H}$ - $^{31}\text{P}$  HMBC 2D NMR spectrum of **5** in pyridine- $d_5$ .

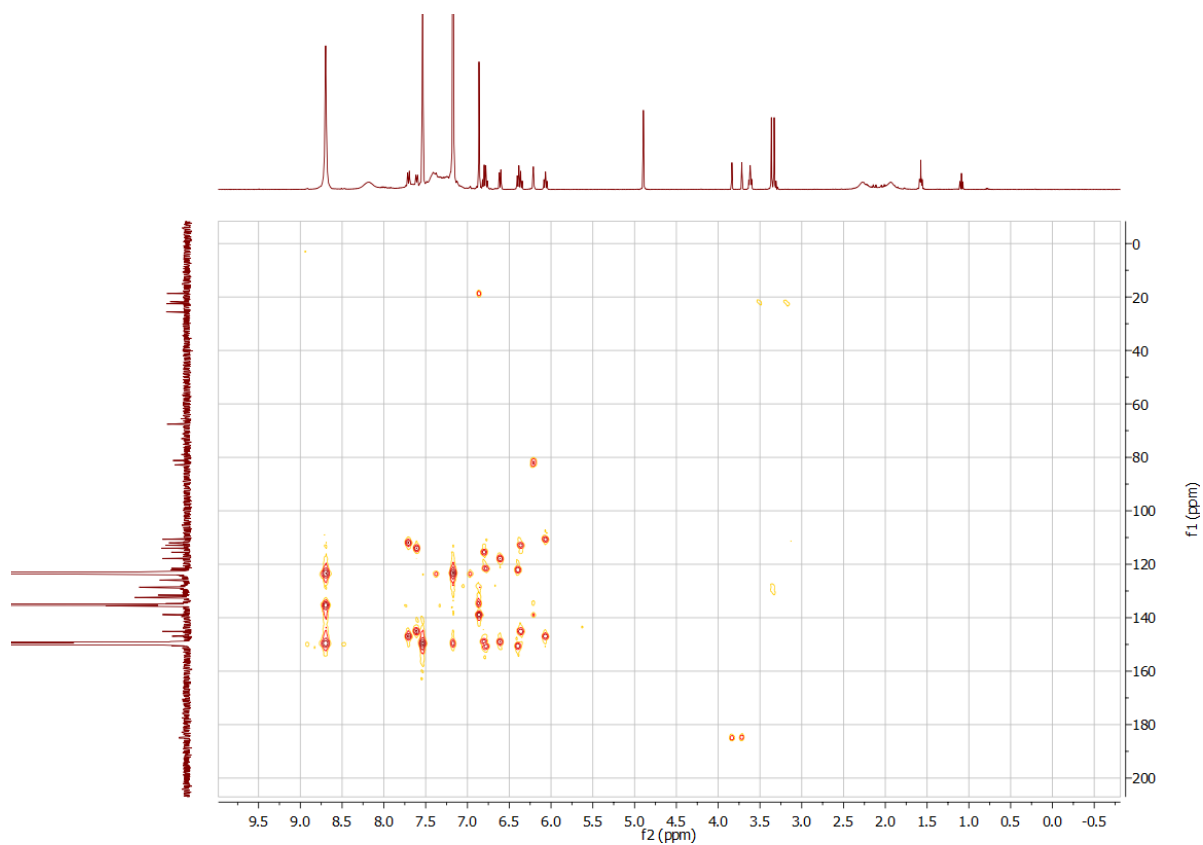

**Figure S31.**  $^1\text{H}$ - $^{13}\text{C}$  HMBC 2D NMR spectrum of **5** in pyridine- $d_5$ .

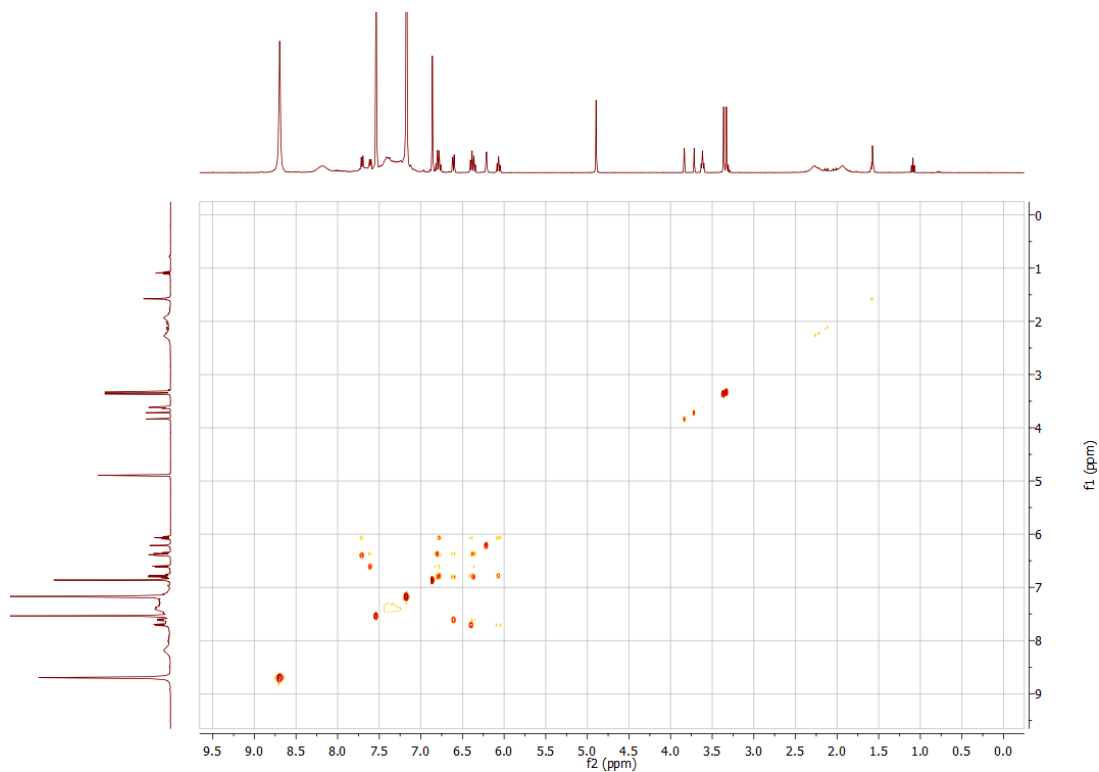

**Figure S32.**  $^1\text{H}$ - $^1\text{H}$  TOSCY 2D NMR spectrum of **5** in pyridine- $d_5$ .

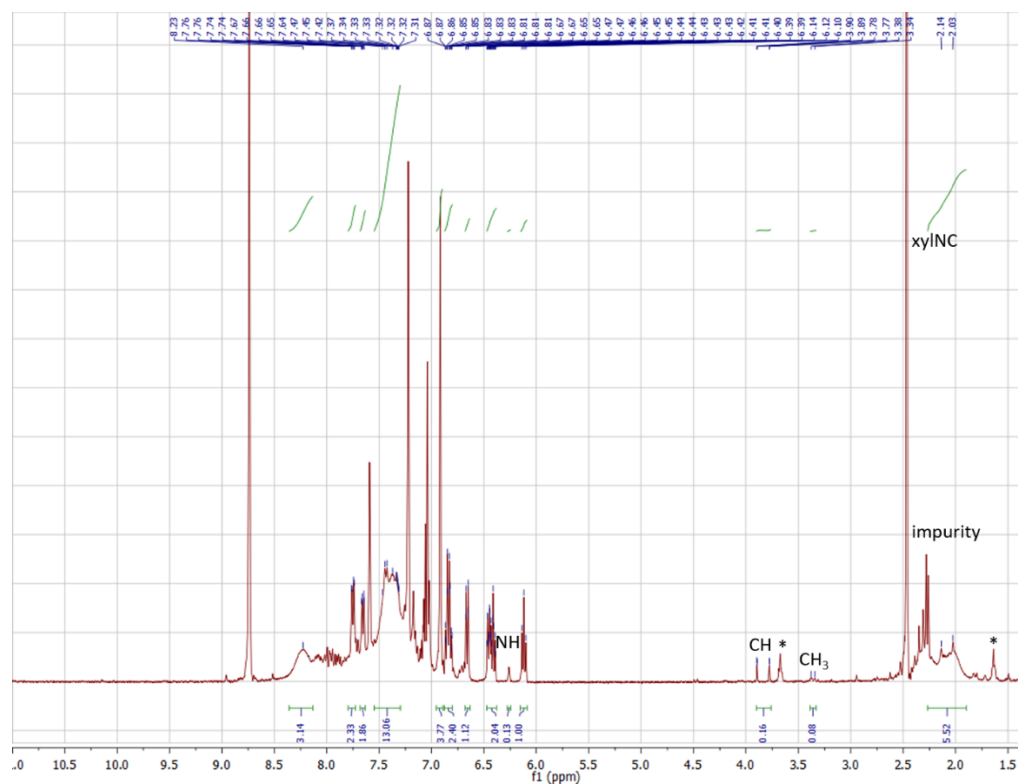

**Figure S33.**  $^1\text{H}$  NMR spectrum of **5-d<sub>5</sub>** in pyridine- $d_5$ . \* =  $\text{Et}_2\text{O}$ .

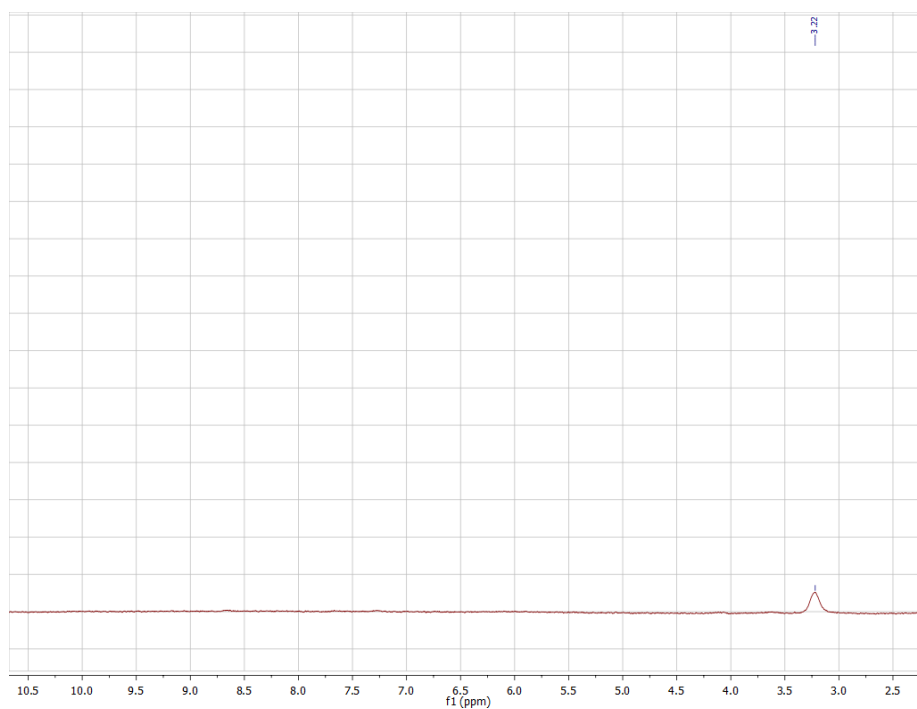

**Figure S34.**  $^2\text{H}$  NMR spectrum of **5-d<sub>5</sub>** in Pyridine/ $\text{CD}_3\text{CN}$ . Note: CD and ND peaks from  $\text{CD}^{\text{xyI}}\text{NDCNi}$  were not observed in the  $^2\text{H}$  spectrum. The signal observed in the spectrum corresponds to the  $\text{CD}_3$  group.

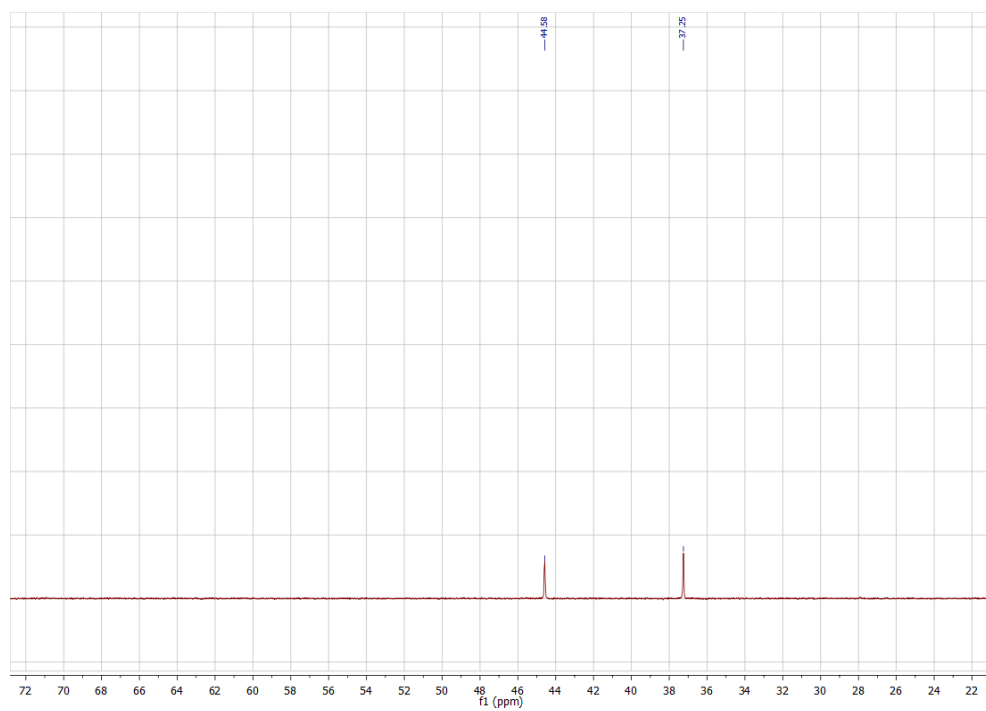

Figure S35.  $^{31}\text{P}\{^1\text{H}\}$  NMR spectrum of **5**- $d_5$  in pyridine- $d_5$ .

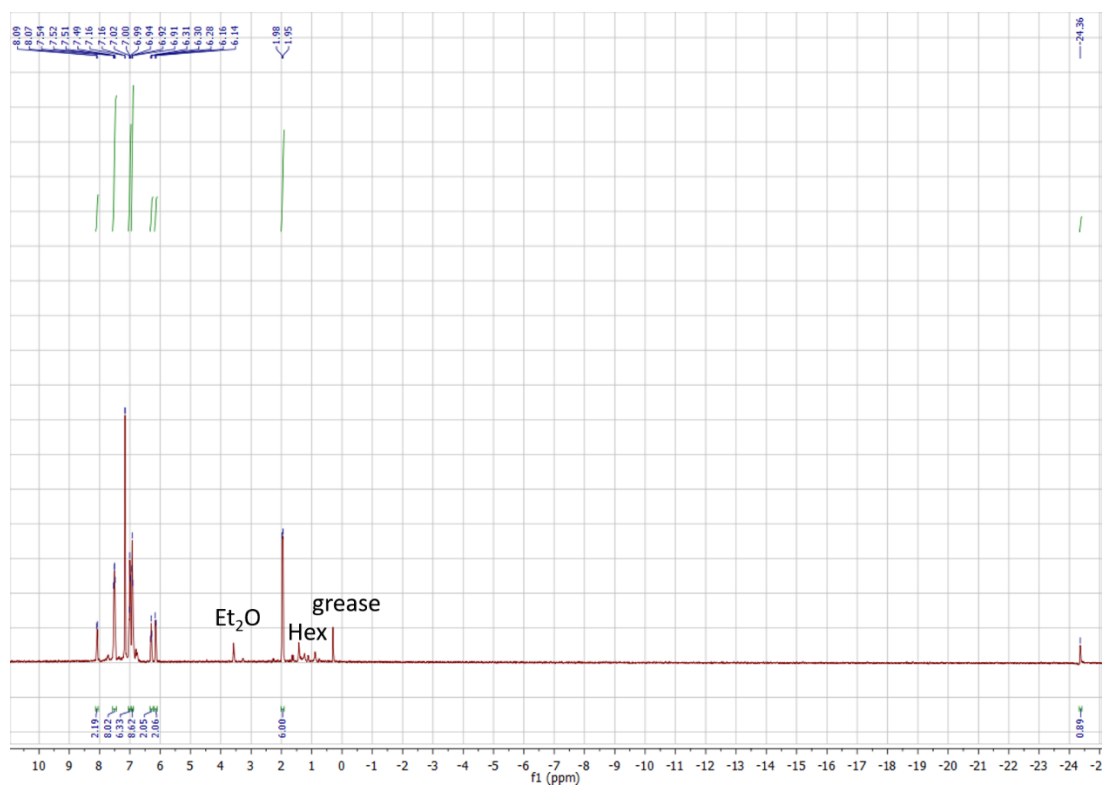

Figure S36a.  $^1\text{H}$  NMR spectrum of **6** in  $\text{C}_6\text{D}_6$ .

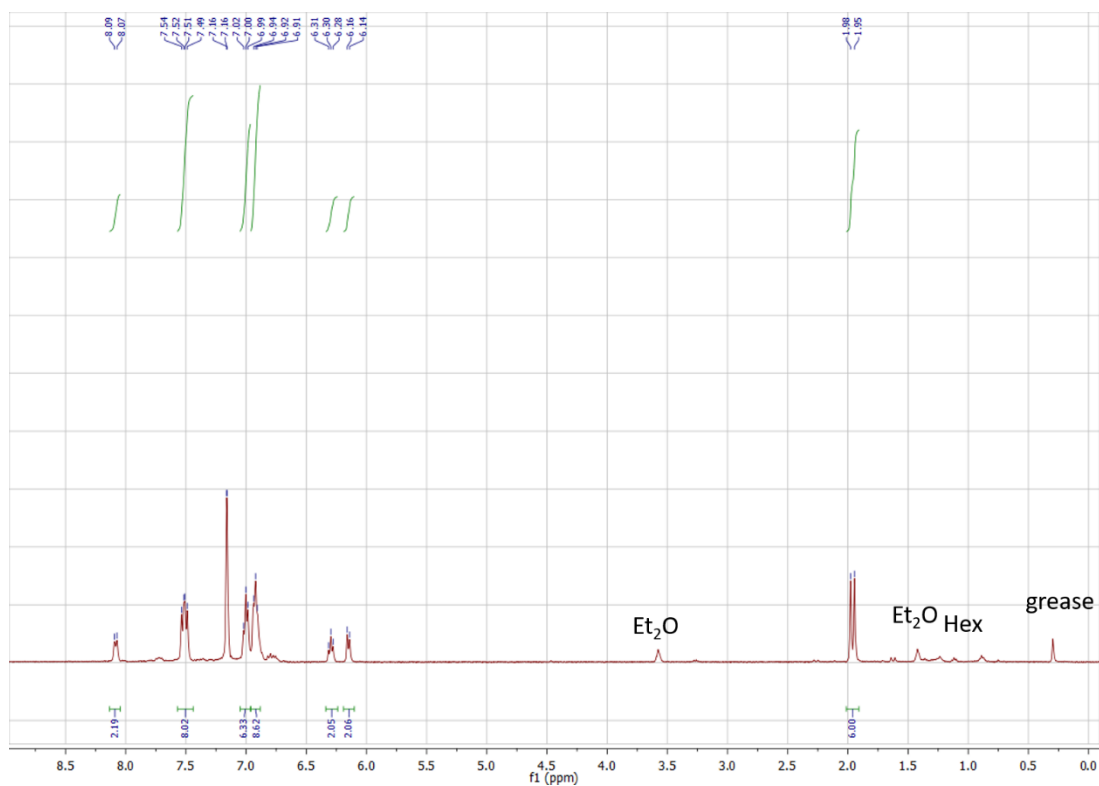

**Figure S36b.** <sup>1</sup>H NMR spectrum (0-9 ppm window) of **6** in C<sub>6</sub>D<sub>6</sub>. Ni-H peak at -24.36 ppm is shown in Figure S36a.

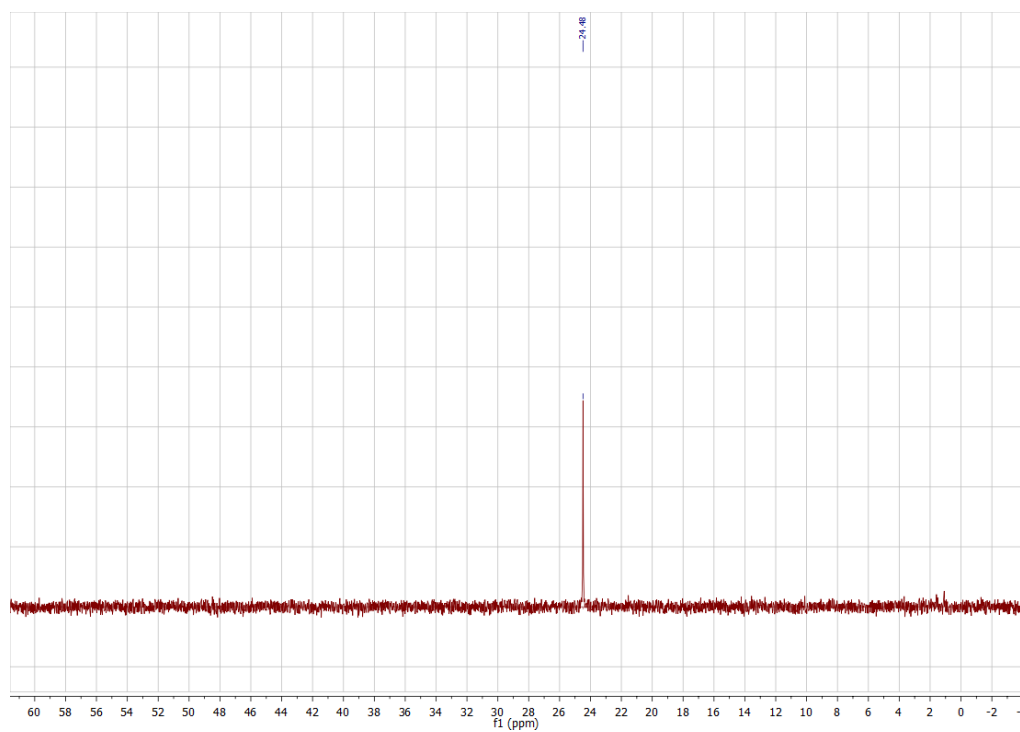

**Figure S37.** <sup>31</sup>P{<sup>1</sup>H} NMR spectrum of **6** in C<sub>6</sub>D<sub>6</sub>.

## 2. Kinetic Study of Isocyanide Insertion

### 2.1: Decay of **4** and **4-*d*<sub>5</sub>**

All kinetic experiments were performed in J. Young NMR tubes in THF-*d*<sub>8</sub> and recorded on a Bruker UNI 400 NMR spectrometer at 300 K. Trimethoxybenzene was added as an internal standard. Samples were prepared by addition of 8 mg of **4** or **4-*d*<sub>5</sub>** in 0.5 ml of THF-*d*<sub>8</sub> to a J. Young tube. <sup>31</sup>P{<sup>1</sup>H} NMR spectroscopy was used to monitor the course of the reaction. The isocyanide (2.5 equiv, 5 mg) was added to the J. Young tube (*t* = 0 min). Spectra were taken periodically and the absolute integrations were converted to concentrations.

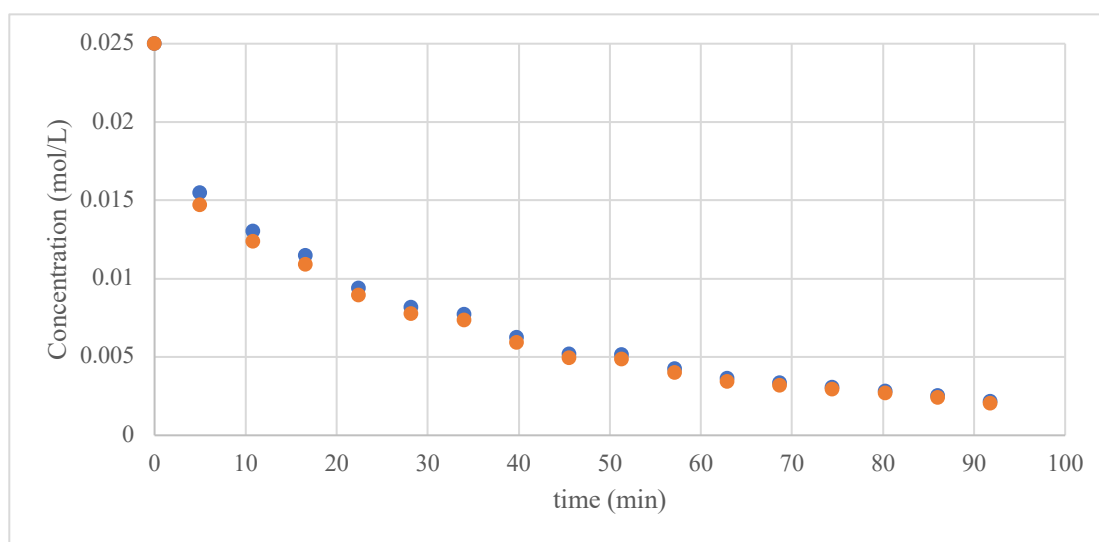

**Figure S55.** Plot of concentration (mol/L) of **4** (blue) and **4-*d*<sub>5</sub>** (orange) vs. time (min).

### Data fitting for decay of **4**

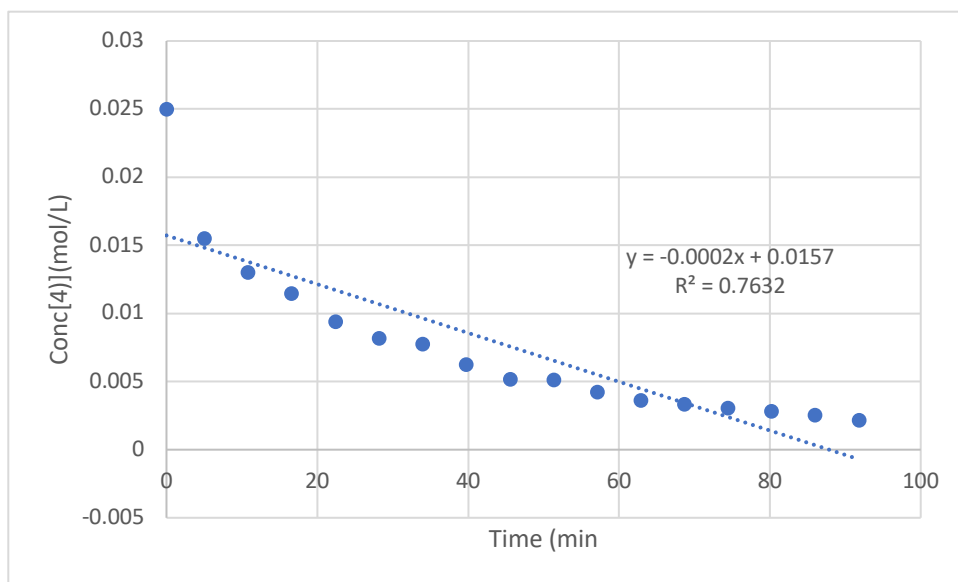

**Figure S56.** Plot of concentration (mol/L) of **4** vs. time (min) with 2.5 equiv of xylNC.

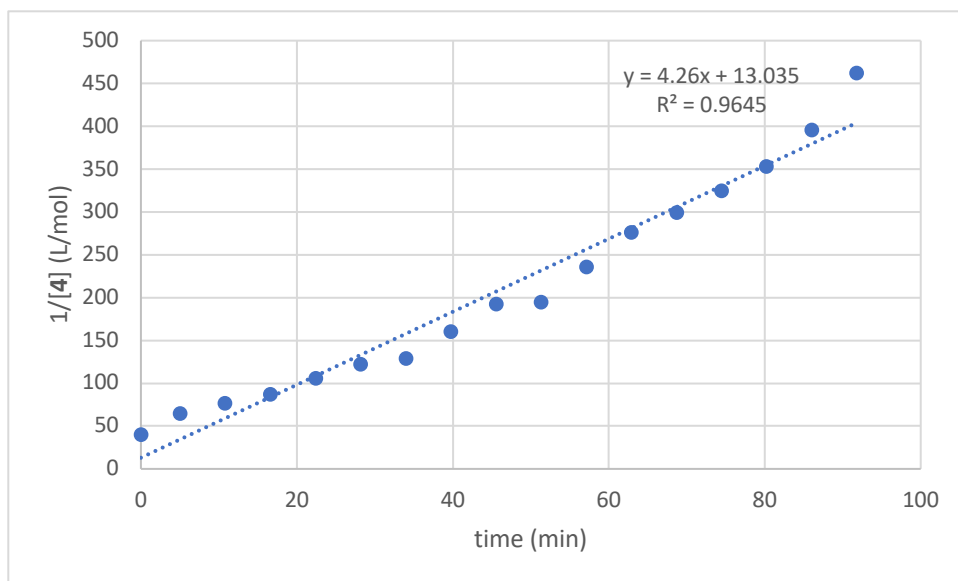

**Figure S57.** Plot of reciprocal of concentration of **4** vs. time (min) with 2.5 equiv of xylNC.

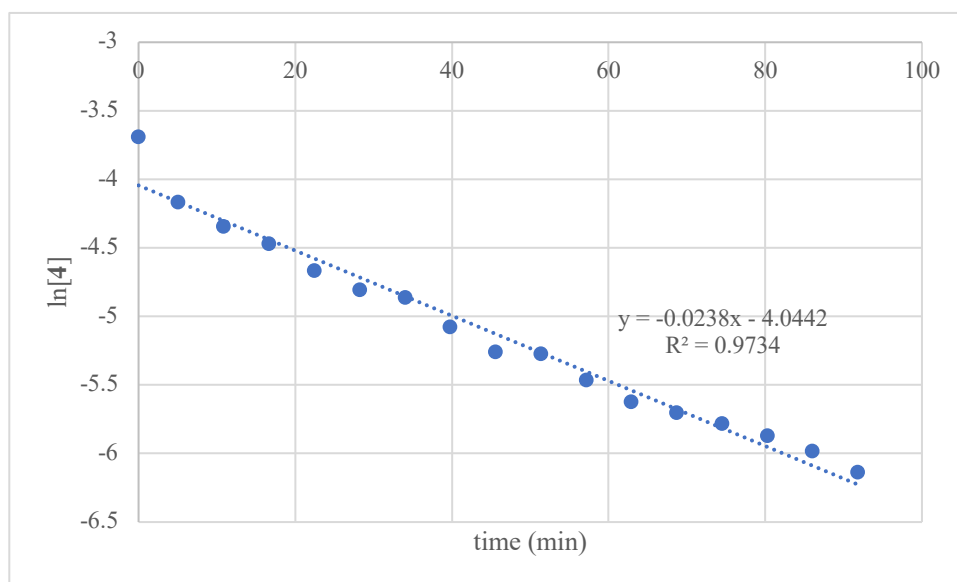

**Figure S58.** Plot of natural logarithm of concentration of **4** vs. time (min) with 2.5 equiv of xylNC.

Data fitting for decay of **4-d<sub>5</sub>**

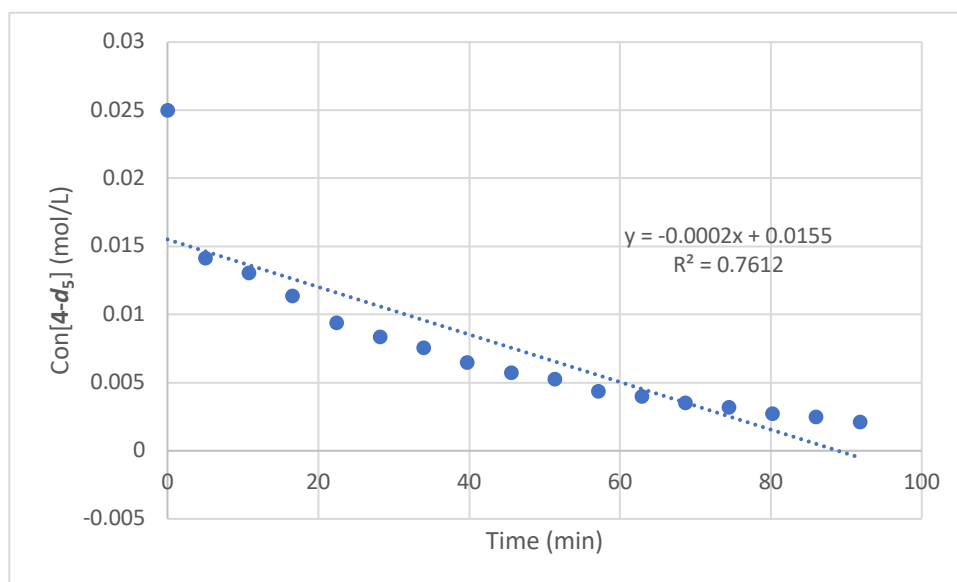

**Figure S59.** Plot of concentration (mol/L) of **4-d<sub>5</sub>** vs. time (min) with 2.5 equiv of xylNC.

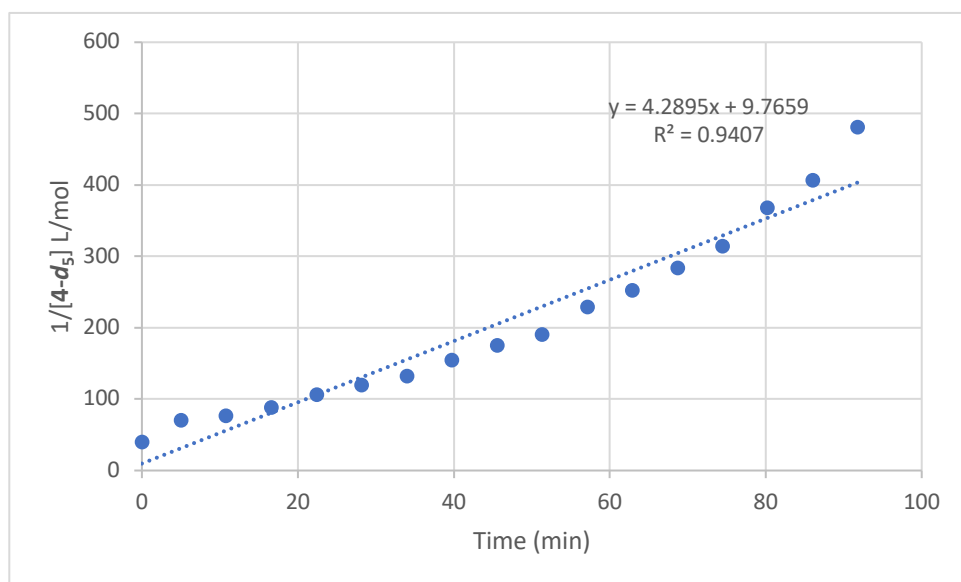

**Figure S60.** Plot of reciprocal of concentration of 4-d<sub>5</sub> vs. time (min) with 2.5 equiv of xylNC.

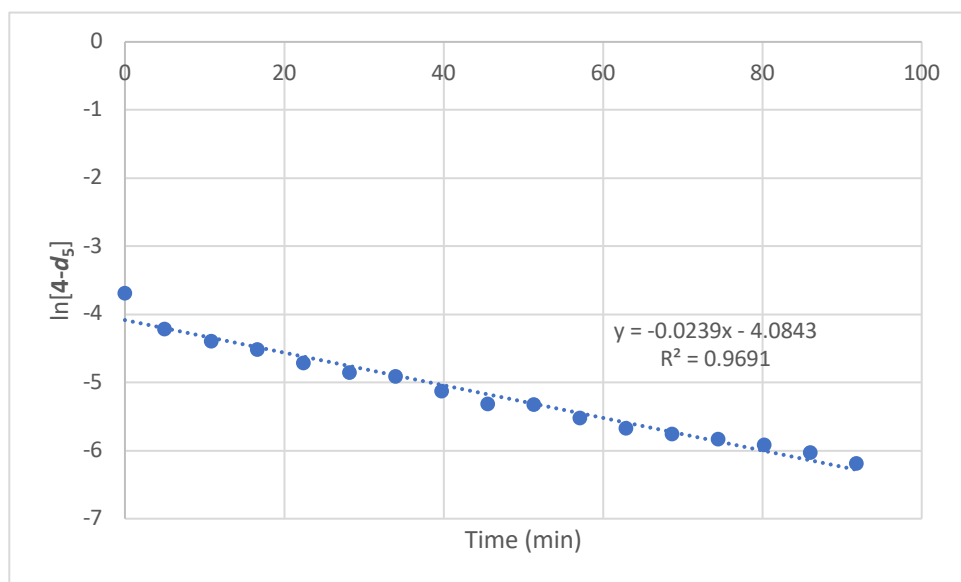

**Figure S61.** Plot of natural logarithm of concentration of 4-d<sub>5</sub> vs. time (min) with 2.5 equiv of xylNC.

## 2.2: Formation of **5** and **5-d<sub>5</sub>**

For KIE studies on the formation of final product (**5**), the initial rate was recorded by plotting the concentration of formed product with time within the first 10% formation.

**Table S62.** Reaction rate of **4** and **4-d<sub>5</sub>** converting to final product **5** and **5-d<sub>5</sub>**. See below for data fitting.

|                                                                                     | <b>5</b>                | <b>5-d<sub>5</sub></b>  | KIE     |
|-------------------------------------------------------------------------------------|-------------------------|-------------------------|---------|
| Reaction rate for formation of product<br>(mole L <sup>-1</sup> min <sup>-1</sup> ) | 1.15 x 10 <sup>-5</sup> | 2.97 x 10 <sup>-6</sup> | 3.9±0.5 |
| Uncertainty of slope                                                                | 0.05 x 10 <sup>-5</sup> | 0.23 x 10 <sup>-6</sup> |         |

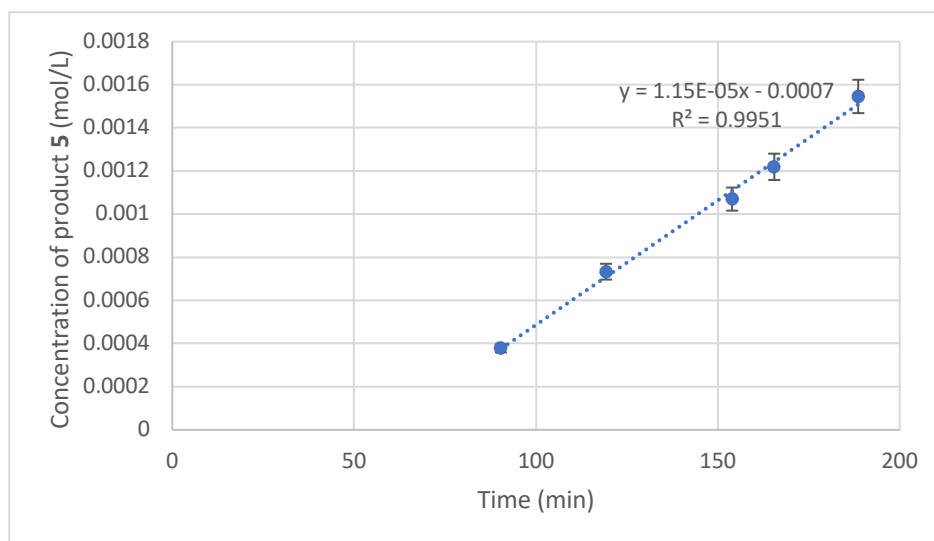

**Figure S63.** Plot of concentration of product **5** (mol/L) vs. time (min) in the isocyanide insertion reaction with **4**.

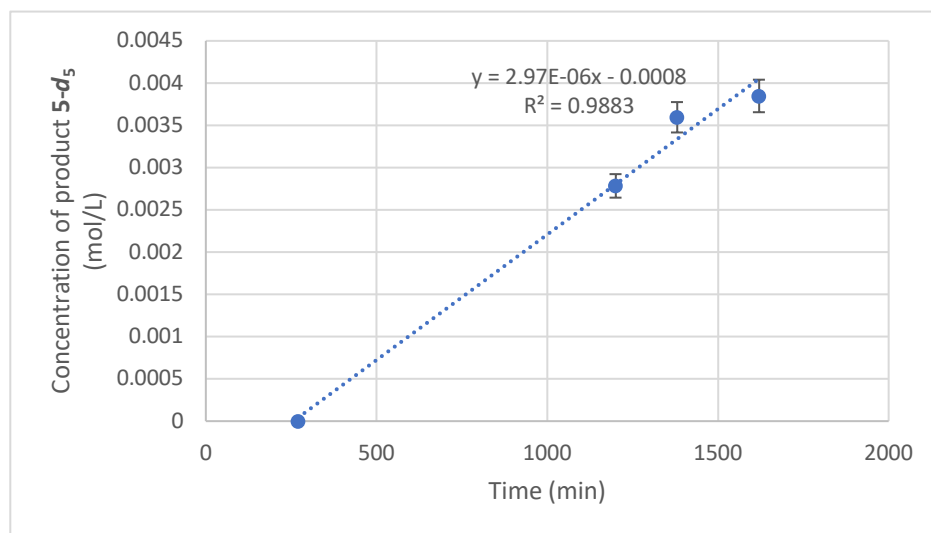

**Figure S64.** Plot of concentration of product (mol/L) over time (min) in the isocyanide insertion reaction with **4-d<sub>5</sub>**.

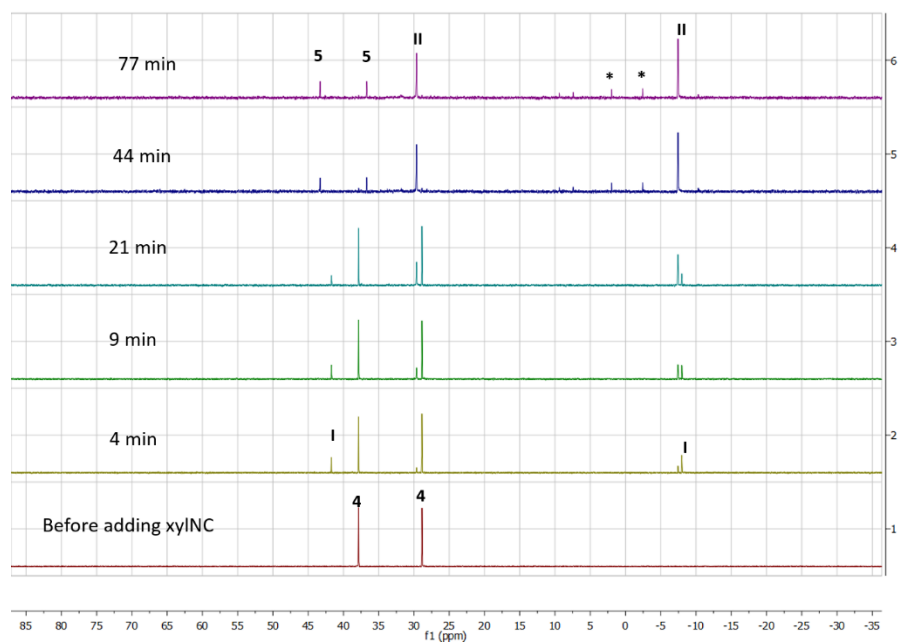

**Figure S65.** Selected  $^{31}\text{P}\{^1\text{H}\}$  NMR spectra of the isocyanide insertion reaction with metallocycle **4** over time from  $t = 0$  min to  $t = 77$  min at 300K.

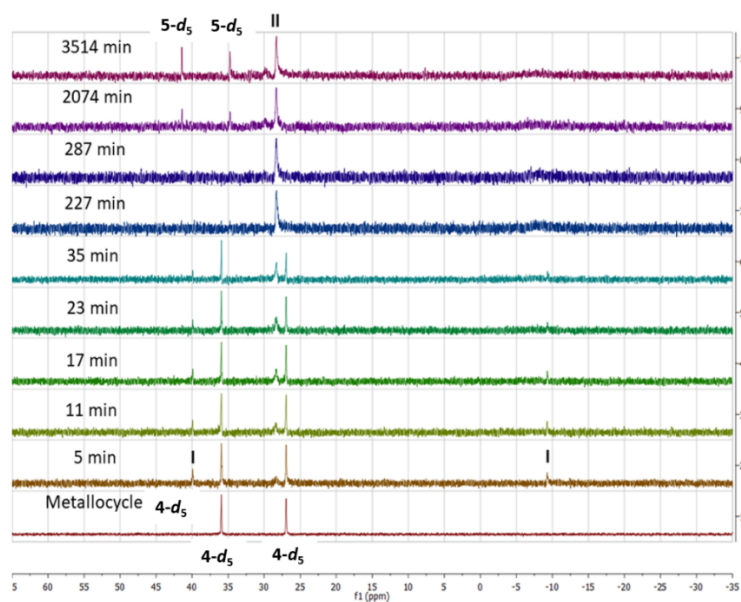

**Figure S66.** Selected  $^{31}\text{P}\{^1\text{H}\}$  NMR spectra of the isocyanide insertion reaction with metallocycle **4-d<sub>5</sub>** over time from  $t = 0$  min to  $t = 3514$  min at 300K.

2.3: Addition of 10 equiv of xylNC

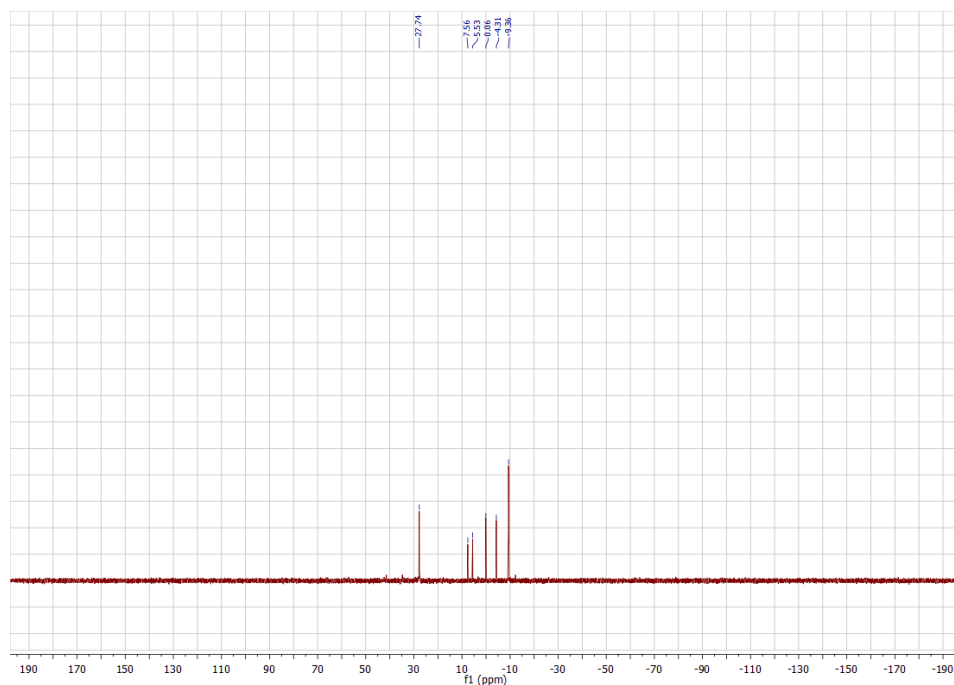

**Figure S67.**  $^{31}\text{P}\{^1\text{H}\}$  NMR spectra of the isocyanide insertion reaction with 10 equiv of xylNC at  $t = 175$  min at 300K. The identity of these species was not identified.

### 3. Crystallographic data

**Table S68.** Summary of Crystallographic data for compounds **2** and **3**

|                                               | <b>2</b>                                                                                                 | <b>3</b>                                                           |
|-----------------------------------------------|----------------------------------------------------------------------------------------------------------|--------------------------------------------------------------------|
| formula                                       | C <sub>51.4</sub> H <sub>54.5</sub> Cl <sub>0.1</sub> N <sub>3</sub> NiO <sub>2.9</sub> P <sub>2</sub> * | C <sub>42</sub> H <sub>40</sub> N <sub>3</sub> NaNiOP <sub>2</sub> |
| fw                                            | 884.87                                                                                                   | 746.41                                                             |
| Temperature/K                                 | 100                                                                                                      | 100                                                                |
| Crystal system                                | triclinic                                                                                                | triclinic                                                          |
| space group                                   | P-1                                                                                                      | P-1                                                                |
| <i>a</i> (Å)                                  | 11.5572(6)                                                                                               | 10.7438(3)                                                         |
| <i>b</i> (Å)                                  | 11.7407(6)                                                                                               | 12.7981(4)                                                         |
| <i>c</i> (Å)                                  | 16.9501(8)                                                                                               | 14.4155(5)                                                         |
| $\alpha$ (deg)                                | 100.184(2)                                                                                               | 69.6770(10)                                                        |
| $\beta$ (deg)                                 | 93.978(2)                                                                                                | 83.8800(10)                                                        |
| $\gamma$ (deg)                                | 102.322(2)                                                                                               | 74.4970(10)                                                        |
| <i>V</i> (Å <sup>3</sup> )                    | 2197.81(19)                                                                                              | 1790.91(10)                                                        |
| <i>Z</i>                                      | 2                                                                                                        | 2                                                                  |
| <i>d</i> <sub>calc</sub> (g/cm <sup>3</sup> ) | 1.337                                                                                                    | 1.384                                                              |
| $\mu$ (mm <sup>-1</sup> )                     | 0.567                                                                                                    | 0.682                                                              |
| <i>F</i> (000)                                | 934.0                                                                                                    | 780.0                                                              |
| Crystal size, mm                              | 0.25 × 0.23 × 0.15                                                                                       | 0.15 × 0.13 × 0.04                                                 |
| 2 $\theta$ range for data collection(deg)     | 6.428 - 55.142                                                                                           | 5.328 - 55.102                                                     |
| Index ranges                                  | -15 ≤ <i>h</i> ≤ 15,                                                                                     | -13 ≤ <i>h</i> ≤ 13,                                               |
|                                               | -15 ≤ <i>k</i> ≤ 15,                                                                                     | -16 ≤ <i>k</i> ≤ 16,                                               |
|                                               | -22 ≤ <i>l</i> ≤ 21                                                                                      | -18 ≤ <i>l</i> ≤ 16                                                |
| Reflections collected                         | 58237                                                                                                    | 48983                                                              |
| Independent reflections                       | 10118[R(int) = 0.0395]                                                                                   | 8248[R(int) = 0.0857]                                              |
| Data/restraints/parameters                    | 10118/0/561                                                                                              | 8248/0/451                                                         |
| Goodness-of-fit on <i>F</i> <sup>2</sup>      | 1.073                                                                                                    | 1.024                                                              |
| Final <i>R</i> indexes                        | <i>R</i> <sub>1</sub> = 0.0406,                                                                          | <i>R</i> <sub>1</sub> = 0.0421,                                    |
| [ <i>I</i> > 2 $\sigma$ ( <i>I</i> )]         | <i>wR</i> <sub>2</sub> = 0.0835                                                                          | <i>wR</i> <sub>2</sub> = 0.0743                                    |
| Final <i>R</i> indexes [all data]             | <i>R</i> <sub>1</sub> = 0.0528,                                                                          | <i>R</i> <sub>1</sub> = 0.0649,                                    |
|                                               | <i>wR</i> <sub>2</sub> = 0.0892                                                                          | <i>wR</i> <sub>2</sub> = 0.0815                                    |
| Largest diff. peak/hole(eÅ <sup>-3</sup> )    | 0.47/-0.41                                                                                               | 0.46/-0.50                                                         |
| CCDC #                                        | 1970109                                                                                                  | 1970112                                                            |

\*Note: Compound 2 has 10% Cl disorder with the phenoxide in the crystal structure.

**Table S69.** Summary of Crystallographic data for compounds **4** and **5**

|                                                                 | <b>4</b>                                                            | <b>5</b>                                                            |
|-----------------------------------------------------------------|---------------------------------------------------------------------|---------------------------------------------------------------------|
| formula                                                         | C <sub>45</sub> H <sub>41</sub> N <sub>3</sub> NiP <sub>2</sub>     | C <sub>49</sub> H <sub>45</sub> N <sub>5</sub> NiP <sub>2</sub>     |
| fw                                                              | 744.46                                                              | 824.55                                                              |
| Temperature/K                                                   | 100                                                                 | 100                                                                 |
| Crystal system                                                  | triclinic                                                           | monoclinic                                                          |
| space group                                                     | P-1                                                                 | P2 <sub>1</sub> /n                                                  |
| <i>a</i> (Å)                                                    | 10.0629(4)                                                          | 8.8277(6)                                                           |
| <i>b</i> (Å)                                                    | 12.4737(5)                                                          | 26.5464(18)                                                         |
| <i>c</i> (Å)                                                    | 15.2136(6)                                                          | 17.2437(11)                                                         |
| $\alpha$ (deg)                                                  | 74.272(2)                                                           | 90                                                                  |
| $\beta$ (deg)                                                   | 87.324(2)                                                           | 94.715(3)                                                           |
| $\gamma$ (deg)                                                  | 79.697(2)                                                           | 90                                                                  |
| <i>V</i> (Å <sup>3</sup> )                                      | 1808.50(13)                                                         | 4027.3(5)                                                           |
| <i>Z</i>                                                        | 2                                                                   | 4                                                                   |
| $d_{\text{calc}}$ (g/cm <sup>3</sup> )                          | 1.367                                                               | 1.360                                                               |
| $\mu$ (mm <sup>-1</sup> )                                       | 0.663                                                               | 0.604                                                               |
| <i>F</i> (000)                                                  | 780.0                                                               | 1728.0                                                              |
| Crystal size, mm                                                | 0.24 × 0.07 × 0.07                                                  | 0.19 × 0.09 × 0.04                                                  |
| 2 $\theta$ range for data collection(deg)                       | 5.806 - 55.1                                                        | 5.65 - 55.124                                                       |
| Index ranges                                                    | -13 ≤ <i>h</i> ≤ 13,<br>-16 ≤ <i>k</i> ≤ 16,<br>-18 ≤ <i>l</i> ≤ 19 | -11 ≤ <i>h</i> ≤ 11,<br>-34 ≤ <i>k</i> ≤ 34,<br>-22 ≤ <i>l</i> ≤ 22 |
| Reflections collected                                           | 76559                                                               | 114083                                                              |
| Independent reflections                                         | 8318[R(int) = 0.0692]                                               | 9287[R(int) = 0.1084]                                               |
| Data/restraints/parameters                                      | 8318/0/462                                                          | 9287/0/518                                                          |
| Goodness-of-fit on <i>F</i> <sup>2</sup>                        | 1.062                                                               | 1.246                                                               |
| Final <i>R</i> indexes<br>[ <i>I</i> ≥ 2 $\sigma$ ( <i>I</i> )] | <i>R</i> <sub>1</sub> = 0.0393,<br><i>wR</i> <sub>2</sub> = 0.0819  | <i>R</i> <sub>1</sub> = 0.07456,<br><i>wR</i> <sub>2</sub> = 0.1625 |
| Final <i>R</i> indexes [all data]                               | <i>R</i> <sub>1</sub> = 0.0537,<br><i>wR</i> <sub>2</sub> = 0.0880  | <i>R</i> <sub>1</sub> = 0.0926,<br><i>wR</i> <sub>2</sub> = 0.1691  |
| Largest diff. peak/hole(eÅ <sup>-3</sup> )                      | 1.11/-0.43                                                          | 0.87/-0.59                                                          |
| CCDC #                                                          | 1970110                                                             | 1970111                                                             |
